# Supplementary material
Source: Elsevier journal article supplement (https://oceanrep.geomar.de/id/eprint/31420/1/mmc1.docx)
Supplement: mmc1 [file mmc1.docx]

**Table S1.-** Taxa list and functional/morphological group: Sheet - Sheet-like algae; Fil - Filamentous algae; CB - Coarsely branched algae; L/C - Leathery / Cartilagineous algae; AC - Articulated Corallinales; Crust - Crustose algae; CF - Canopy-forming algae; Ff - Filter feeders.

| **Group** | **Taxa** | **Group** | **Taxa** | **Group** | **Taxa** |
| --- | --- | --- | --- | --- | --- |
| Fil | *Cyanophyta* | CB | *Champia parvula* | CB | *Osmundea pinnatifida* |
| CB | *Cladostephus spongiosus* | CB | *Chondracanthus acicularis* | L/C | *Peyssonelia coriacea* |
| Sheet | *Colpomenia sinuosa* | CB | *Chondracanthus teedei* | Crust | *Peyssonnelia dubyi* |
| Sheet | *Cutleria spp.* | CB | *Chondria capillaris* | Fil | *Pleonosporium borreri* |
| CF | *Cystoseira compressa* | CB | *Chondria coerulescens* | CB | *Plocamium cartilagineum* |
| CF | *Cystoseira ericaefolia* | CB | *Chondra dasyphylla* | Fil | *Polysiphonia* cf *nigra* |
| CF | *Cystoseira mauritanica* | CB | *Chondrophycus tenerrimus* | Fil | *Polysiphonia* spp. |
| Sheet | *Dictyota dichotoma* | AC | *Corallina* spp. | Sheet | *Porphyra* cf *leucosticta* |
| Fil | *Ectocarpales* | Fil | *Crouania attenuata* | CB | *Pterocladiella capillacea* |
| CB | *Halopteris filicina* | Sheet | *Cryptopleura ramosa* | Fil | *Pterosiphonia ardreana* |
| CB | *Halopteris scoparia* | Fil | *Dasya* spp. | CB | *Pterosiphonia complanata* |
| L/C | *Padina pavonia* | Sheet | *Drachiella spectabilis* | Fil | *Pterosiphonia parasitica* |
| Crust | *Ralfsia verrucosa* | Fil | *Erythrotrichia carnea* | Fil | *Pterosiphonia pennata* |
| CF | *Sargassum vulgare* | Fil | *Erythrotrichia bertholdii* | L/C | *Rhodophyllis divaricata* |
| Fil | *Scytosiphon dotyi* | CB | *Gastroclonium clavatum* | L/C | *Rhodymenia ardissonei* |
| Fil | *Sphacelaria* cf. *cirrosa* | CB | *Gastroclonium reflexum* | CB | *Rythyplaea tinctoria* |
| Fil | *Sphacelaria fusca* | CB | *Gastroclonium ovatum* | CB | *Solieria chordalis* |
| Fil | *Sphacelaria tribuloides* | CB | *Gelidium crinale* | Fil | *Spermothamnion repens* |
| Sheet | *Taonia atomaria* | CB | *Gelidium spinosum* | CB | *Sphaerococcus coronopifolius* |
| Sheet | *Acrosorium ciliolatum* | CB | *Gelidium pusillum* | Fil | *Spyridia filamentosa* |
| Fil | *Aglaothamnion gallicum* | CB | *Gracilaria* cf *armata* | Fil | *Taenioma nanum* |
| Fil | *Aglaothamnion hookeri* | CB | *Grateloupia subpectinata* | Fil | *Trailliella intricata* |
| AC | *Amphiroa beauvoisii* | Fil | *Griffithsia* spp. | AC | *Acetabularia acetabulum* |
| AC | *Amphiroa cryptarthrodia* | L/C | *Gymnogongrus crenulatus* | Fil | *Bryopsis cf cupressina* |
| AC | *Amphiroa rigida* | L/C | *Gymnogongrus griffithsiae* | Fil | *Bryopsis duplex* |
| Fil | *Anotrichium tenue* | AC | *Haliptilon squamatum* | Fil | *Bryopsis hypnoides* |
| L/C | *Anfeltiopsis devoniensis* | AC | *Haliptilon virgatum* | Fil | *Chaetomorpha aerea* |
| Fil | *Anthithamniella elegans* | CF | *Halopithys incurva* | Fil | *Chaetomorpha ligustica* |
| Fil | *Antithamnionella boergesenii* | CB | *Halurus flosculosus* | Fil | *Chaetomorpha mediterranea* |
| Fil | *Anthithmanion cruciatum* | Sheet | *Haraldia lenormandii* | Fil | *Cladophora sericea* |
| Fil | *Anthithmanion decipiens* | Sheet | *Haraldiophyllum bonnemaisonii* | Fil | *Cladophora hutchinsiae* |
| CB | *Asparagopsis armata* | Crust | *Hildenbrandia rubra* | Fil | *Cladophora laetevirens* |
| CB | *Asparagopsis taxiformis* | Fil | *Herposiphonia secunda* | Fil | *Cladophora prolifera* |
| Fil | *Falkenbergia rufolanosa* | Fil | *Heterosiphonia crispella* | AC | *Codium adhaerens* |
| CB | *Bonnemaissonia asparagoides* | CB | *Hypnea musciformis* | AC | *Codium bursa* |
| Fil | *Boergeseniella fruticulosa* | Sheet | *Hypoglossum hypoglosoides* | CF | *Codium fragile* |
| Fil | *Callithamnion corymbosum* | AC | *Jania longifurca* | Fil | *Derbesia marina* |
| Fil | *Callithamnion granulatum* | AC | *Jania rubens* | Fil | *Pedobepsia simplex* |
| Fil | *Callithamnion tetragonum* | CB | *Lejolisia* sp. | Sheet | *Ulva compressa* |
| CB | *Caulacanthus ustulatus* | CB | *Laurencia obtusa* | Sheet | *Ulva clathrata* |
| Fil | *Ceramium brevizonatum* | Crust | *Lithophyllum corallinae* | Sheet | *Ulva rigida* |
| Fil | *Centroceras clavatum* | Crust | *Lithophyllum incrustans* | AC | *Valonia utricularis* |
| Fil | *Ceramium echionotum* | Crust | *Lithophyllum lichenoides* | Fil | *Vaucheria* spp. |
| Fil | *Ceramium* cf *deslongchampsii* | Crust | *Lithophyllum pustulatum* | Ff | *Mytilidae* |
| Fil | *Ceramium diaphanum* | CB | *Lomentaria articulata* | Ff | *Ostreidae* |
| Fil | *Ceramium ciliatum* | CB | *Lomentaria catenata* | Ff | *Balanus* spp. |
| Fil | *Ceramium* cf *cimbricum* | Fil | *Lophosiphonia reptabunda* | Ff | *Cheilostomatida* |
| Fil | *Ceramium* cf *tenerrimun* | Crust | *Neogoniolithon brassica-florida* | Ff | *Didemnidae* |
| Fil | *Gayliella flaccida* | Crust | *Mesophyllum expansum* | Ff | *Actinia equina* |
| Fil | *Ceramium secundatum* | Crust | *Mesophyllum lichenoides* | Ff | *Lithophaga* spp. |
| Fil | *Ceramium* cf *strictum* | Fil | *Monosporus pedicellatus* | Ff | *Briozoo* |
| Fil | *Ceramium polyceras* | Fil | *Ophiocladus simplicimus* | Ff | *Aglaophenia* spp. |
| CB | *Champia parvula* | CB | *Osmundea hybrida* |  |  |

**Table S2.-** Mean abundance (gr) of taxa at each sampling site. Mean ± Standard Deviation.

| **Taxa** | **Mi** | | | **TG** | | | **CH** | | | **TQ** | | | **Ar** | | | **Ca** | | |
| --- | --- | --- | --- | --- | --- | --- | --- | --- | --- | --- | --- | --- | --- | --- | --- | --- | --- | --- |
| *Cyanophyta* | 0 | ± | 0 | 0 | ± | 0 | 0 | ± | 0 | 0 | ± | 0 | 0 | ± | 0 | 0 | ± | 0 |
| *Cladostephus spongiosus* | 0 | ± | 0 | 0 | ± | 0 | 0.08 | ± | 0.12 | 0 | ± | 0 | 0 | ± | 0 | 0 | ± | 0 |
| *Colpomenia sinuosa* | 0 | ± | 0.01 | 0 | ± | 0 | 0 | ± | 0 | 0.06 | ± | 0.10 | 0.09 | ± | 0.11 | 0.11 | ± | 0.20 |
| *Cutleria spp.* | 0 | ± | 0 | 0 | ± | 0 | 0 | ± | 0 | 0 | ± | 0 | 0 | ± | 0 | 0 | ± | 0 |
| *Cystoseira compressa* | 0 | ± | 0 | 0 | ± | 0 | 0 | ± | 0 | 0 | ± | 0 | 0 | ± | 0 | 0 | ± | 0 |
| *Cystoseira ericaefolia* | 132.17 | ± | 61.27 | 80.88 | ± | 24.79 | 164.00 | ± | 35.77 | 101.60 | ± | 23.17 | 41.14 | ± | 9.68 | 198.83 | ± | 76.96 |
| *Cystoseira mauritanica* | 0 | ± | 0 | 0 | ± | 0 | 0 | ± | 0 | 0 | ± | 0 | 0 | ± | 0 | 0 | ± | 0 |
| *Dictyota dichotoma* | 0 | ± | 0 | 0 | ± | 0 | 0.03 | ± | 0.05 | 0.08 | ± | 0.18 | 0 | ± | 0 | 0.09 | ± | 0.16 |
| *Ectocarpales* | 0.11 | ± | 0.13 | 0 | ± | 0.01 | 0.03 | ± | 0.03 | 0 | ± | 0 | 0 | ± | 0 | 0 | ± | 0 |
| *Halopteris filicina* | 0 | ± | 0 | 0 | ± | 0 | 0 | ± | 0 | 0 | ± | 0 | 0 | ± | 0 | 0 | ± | 0 |
| *Halopteris scoparia* | 0.51 | ± | 0.51 | 0.04 | ± | 0.08 | 1.34 | ± | 2.22 | 0.11 | ± | 0.17 | 0.34 | ± | 0.35 | 0.05 | ± | 0.05 |
| *Padina pavonia* | 0 | ± | 0 | 0.02 | ± | 0.03 | 0 | ± | 0 | 0.07 | ± | 0.13 | 0 | ± | 0 | 0 | ± | 0 |
| *Ralfsia verrucosa* | 0.05 | ± | 0.10 | 0 | ± | 0 | 0 | ± | 0 | 0 | ± | 0 | 0 | ± | 0 | 0 | ± | 0 |
| *Sargassum vulgare* | 0 | ± | 0 | 0 | ± | 0 | 0 | ± | 0 | 0 | ± | 0 | 0 | ± | 0 | 0 | ± | 0 |
| *Scytosiphon dotyi* | 0 | ± | 0 | 0 | ± | 0 | 0 | ± | 0 | 0 | ± | 0 | 0 | ± | 0 | 0 | ± | 0 |
| *Sphacelaria* cf. *cirrosa* | 0 | ± | 0 | 0 | ± | 0 | 0 | ± | 0 | 0.01 | ± | 0.01 | 0 | ± | 0 | 0 | ± | 0 |
| *Sphacelaria fusca* | 0.02 | ± | 0.05 | 0 | ± | 0 | 0 | ± | 0 | 0.05 | ± | 0.11 | 0.04 | ± | 0.08 | 0 | ± | 0 |
| *Sphacelaria tribuloides* | 0 | ± | 0 | 0 | ± | 0 | 0 | ± | 0 | 0 | ± | 0 | 0 | ± | 0 | 0 | ± | 0 |
| *Taonia atomaria* | 0 | ± | 0 | 0 | ± | 0 | 0 | ± | 0 | 0 | ± | 0 | 0 | ± | 0 | 0 | ± | 0 |
| *Acrosorium ciliolatum* | 0 | ± | 0 | 0 | ± | 0 | 0 | ± | 0 | 0 | ± | 0 | 0 | ± | 0 | 0 | ± | 0 |
| *Aglaothamnion gallicum* | 0.06 | ± | 0.13 | 0 | ± | 0 | 0.03 | ± | 0.04 | 0 | ± | 0 | 0 | ± | 0 | 0 | ± | 0 |
| *Aglaothamnion hookeri* | 0 | ± | 0.01 | 0 | ± | 0 | 0 | ± | 0 | 0 | ± | 0 | 0 | ± | 0 | 0 | ± | 0 |
| *Amphiroa beauvoisii* | 0.12 | ± | 0.17 | 0 | ± | 0 | 0 | ± | 0 | 0 | ± | 0 | 0 | ± | 0.02 | 0 | ± | 0 |
| *Amphiroa cryptarthrodia* | 0 | ± | 0 | 0 | ± | 0 | 0 | ± | 0 | 0 | ± | 0 | 0 | ± | 0 | 0 | ± | 0 |
| *Amphiroa rigida* | 0.37 | ± | 0.74 | 0 | ± | 0 | 0 | ± | 0 | 0 | ± | 0.02 | 0 | ± | 0 | 0.45 | ± | 0.78 |
| *Anotrichium tenue* | 0 | ± | 0 | 0 | ± | 0 | 0 | ± | 0 | 0 | ± | 0 | 0 | ± | 0 | 0 | ± | 0 |
| *Anfeltiopsis devoniensis* | 0 | ± | 0 | 0 | ± | 0.01 | 0 | ± | 0 | 0 | ± | 0 | 0 | ± | 0 | 0 | ± | 0 |
| *Anthithamniella elegans* | 0 | ± | 0 | 0 | ± | 0 | 0 | ± | 0 | 0 | ± | 0 | 0.04 | ± | 0.08 | 0 | ± | 0 |
| *Antithamnionella boergesenii* | 0 | ± | 0 | 0.08 | ± | 0.17 | 0 | ± | 0 | 0 | ± | 0 | 0 | ± | 0 | 0 | ± | 0 |
| *Anthithmanion cruciatum* | 0 | ± | 0 | 0 | ± | 0 | 0 | ± | 0 | 0 | ± | 0 | 0 | ± | 0 | 0 | ± | 0 |
| *Anthithmanion decipiens* | 0 | ± | 0 | 0 | ± | 0 | 0 | ± | 0 | 0 | ± | 0 | 0 | ± | 0 | 0 | ± | 0 |
| *Asparagopsis armata* | 0 | ± | 0 | 0 | ± | 0 | 0 | ± | 0 | 0 | ± | 0 | 0.05 | ± | 0.08 | 0 | ± | 0 |
| *Asparagopsis taxiformis* | 0 | ± | 0 | 0 | ± | 0 | 0 | ± | 0 | 0 | ± | 0 | 0 | ± | 0 | 0 | ± | 0 |
| *Falkenbergia rufolanosa* | 0 | ± | 0 | 0 | ± | 0 | 0 | ± | 0 | 0 | ± | 0 | 0.02 | ± | 0.04 | 0 | ± | 0 |
| *Bonnemaissonia asparagoides* | 0 | ± | 0 | 0 | ± | 0 | 0 | ± | 0 | 0.04 | ± | 0.08 | 0 | ± | 0 | 0 | ± | 0 |
| *Boergeseniella fruticulosa* | 0.32 | ± | 0.63 | 3.28 | ± | 6.00 | 0.16 | ± | 0.16 | 1.40 | ± | 2.78 | 0 | ± | 0 | 0 | ± | 0 |
| *Callithamnion corymbosum* | 0 | ± | 0 | 0.09 | ± | 0.16 | 0.04 | ± | 0.07 | 0 | ± | 0 | 0 | ± | 0 | 0 | ± | 0 |
| *Callithamnion granulatum* | 0 | ± | 0 | 0.05 | ± | 0.07 | 0 | ± | 0 | 0 | ± | 0.01 | 0.13 | ± | 0.05 | 0 | ± | 0 |
| *Callithamnion tetragonum* | 0 | ± | 0 | 0 | ± | 0 | 0 | ± | 0 | 0 | ± | 0 | 0 | ± | 0 | 0 | ± | 0 |
| *Caulacanthus ustulatus* | 0 | ± | 0 | 0 | ± | 0.01 | 0 | ± | 0 | 0 | ± | 0 | 0 | ± | 0 | 0 | ± | 0 |
| *Ceramium brevizonatum* | 0 | ± | 0 | 0 | ± | 0 | 0 | ± | 0 | 0 | ± | 0 | 0 | ± | 0 | 0 | ± | 0 |
| *Centroceras clavatum* | 0 | ± | 0 | 0 | ± | 0 | 0 | ± | 0 | 0 | ± | 0 | 0 | ± | 0 | 0 | ± | 0 |
| *Ceramium echionotum* | 0 | ± | 0 | 0 | ± | 0.01 | 0 | ± | 0 | 0 | ± | 0 | 1.21 | ± | 1.97 | 0 | ± | 0 |
| *Ceramium* cf *deslongchampsii* | 0 | ± | 0 | 0 | ± | 0 | 0 | ± | 0 | 0 | ± | 0 | 0 | ± | 0 | 0 | ± | 0 |
| *Ceramium diaphanum* | 0 | ± | 0 | 0 | ± | 0 | 0 | ± | 0 | 0 | ± | 0 | 0 | ± | 0 | 0 | ± | 0 |
| *Ceramium ciliatum* | 0.01 | ± | 0.02 | 0.09 | ± | 0.17 | 0.01 | ± | 0.02 | 0.01 | ± | 0.03 | 0.28 | ± | 0.28 | 0 | ± | 0 |
| *Ceramium* cf *cimbricum* | 0 | ± | 0 | 0 | ± | 0 | 0 | ± | 0 | 0 | ± | 0 | 0 | ± | 0 | 0 | ± | 0 |
| *Ceramium* cf *tenerrimun* | 0 | ± | 0 | 0 | ± | 0 | 0 | ± | 0 | 0 | ± | 0 | 0 | ± | 0 | 0 | ± | 0 |
| *Gayliella flaccida* | 0.19 | ± | 0.23 | 0 | ± | 0 | 0 | ± | 0 | 0 | ± | 0 | 0.72 | ± | 0.68 | 0 | ± | 0 |
| *Ceramium secundatum* | 4.26 | ± | 6.90 | 0.72 | ± | 0.96 | 0.14 | ± | 0.08 | 0 | ± | 0 | 0.16 | ± | 0.06 | 0.03 | ± | 0.05 |
| *Ceramium* cf *strictum* | 0 | ± | 0 | 0 | ± | 0 | 0 | ± | 0 | 0 | ± | 0 | 0 | ± | 0 | 0 | ± | 0 |
| *Ceramium polyceras* | 0.02 | ± | 0.05 | 0.01 | ± | 0.01 | 0 | ± | 0 | 0 | ± | 0 | 0 | ± | 0 | 0 | ± | 0 |
| *Champia parvula* | 0 | ± | 0 | 0 | ± | 0 | 0 | ± | 0 | 0 | ± | 0 | 0 | ± | 0 | 0 | ± | 0 |
| *Chondracanthus acicularis* | 8.13 | ± | 9.78 | 1.21 | ± | 1.09 | 0 | ± | 0 | 1.39 | ± | 2.78 | 1.06 | ± | 0.50 | 0 | ± | 0 |
| *Chondracanthus teedei* | 0.32 | ± | 0.63 | 0 | ± | 0 | 0 | ± | 0 | 0 | ± | 0 | 0 | ± | 0 | 0 | ± | 0 |
| *Chondria capillaris* | 0 | ± | 0 | 0 | ± | 0 | 0 | ± | 0 | 0 | ± | 0 | 0 | ± | 0 | 0 | ± | 0 |
| *Chondria coerulescens* | 0 | ± | 0 | 0 | ± | 0 | 0 | ± | 0 | 0 | ± | 0 | 0.22 | ± | 0.20 | 0 | ± | 0 |
| *Chondra dasyphylla* | 0 | ± | 0 | 0 | ± | 0 | 0 | ± | 0 | 0 | ± | 0 | 0 | ± | 0 | 0 | ± | 0 |
| *Chondrophycus tenerrimus* | 0 | ± | 0 | 0 | ± | 0 | 0 | ± | 0 | 0 | ± | 0 | 0 | ± | 0 | 0 | ± | 0 |
| *Corallina* spp. | 8.66 | ± | 7.55 | 35.00 | ± | 16.68 | 7.78 | ± | 7.27 | 10.01 | ± | 12.69 | 2.20 | ± | 1.12 | 0.02 | ± | 0.03 |
| *Crouania attenuata* | 0 | ± | 0 | 0 | ± | 0 | 0 | ± | 0 | 0 | ± | 0 | 0 | ± | 0 | 0 | ± | 0 |
| *Cryptopleura ramosa* | 0 | ± | 0 | 0 | ± | 0 | 0 | ± | 0 | 0 | ± | 0 | 0 | ± | 0 | 0 | ± | 0 |
| *Dasya* spp. | 0.26 | ± | 0.29 | 0 | ± | 0 | 0.04 | ± | 0.07 | 0.05 | ± | 0.11 | 0.16 | ± | 0.15 | 0 | ± | 0 |
| *Drachiella spectabilis* | 0 | ± | 0 | 0 | ± | 0 | 0.04 | ± | 0.07 | 0 | ± | 0 | 0 | ± | 0 | 0 | ± | 0 |
| *Erythrotrichia carnea* | 0.04 | ± | 0.04 | 0 | ± | 0 | 0.01 | ± | 0.02 | 0 | ± | 0 | 0.02 | ± | 0.03 | 0 | ± | 0 |
| *Erythrotrichia bertholdii* | 0.01 | ± | 0.02 | 0 | ± | 0 | 0 | ± | 0 | 0 | ± | 0 | 0 | ± | 0 | 0 | ± | 0 |
| *Gastroclonium clavatum* | 0.04 | ± | 0.07 | 0 | ± | 0 | 4.24 | ± | 7.04 | 0 | ± | 0 | 0 | ± | 0 | 0 | ± | 0 |
| *Gastroclonium reflexum* | 0.05 | ± | 0.11 | 0 | ± | 0 | 0.02 | ± | 0.03 | 0 | ± | 0.01 | 0 | ± | 0 | 0 | ± | 0 |
| *Gastroclonium ovatum* | 0 | ± | 0 | 0 | ± | 0 | 0 | ± | 0 | 0 | ± | 0 | 0 | ± | 0 | 0 | ± | 0 |
| *Gelidium crinale* | 0 | ± | 0 | 0 | ± | 0 | 0 | ± | 0 | 0 | ± | 0 | 0.05 | ± | 0.09 | 0 | ± | 0 |
| *Gelidium spinosum* | 6.33 | ± | 7.38 | 1.52 | ± | 2.52 | 0 | ± | 0 | 0.06 | ± | 0.12 | 0 | ± | 0 | 0 | ± | 0 |

**Table S2 (cont.).-** Mean abundance (gr) of taxa at each sampling site. Mean ± Standard Deviation.

| **Taxa** | **He** | | | **Ri** | | | **CR** | | | **GV** | | | **Rq** | | | **Co** | | |
| --- | --- | --- | --- | --- | --- | --- | --- | --- | --- | --- | --- | --- | --- | --- | --- | --- | --- | --- |
| *Cyanophyta* | 0 | ± | 0 | 0 | ± | 0 | 0 | ± | 0 | 0 | ± | 0 | 0 | ± | 0 | 0 | ± | 0 |
| *Cladostephus spongiosus* | 0 | ± | 0 | 0 | ± | 0 | 0.07 | ± | 0.11 | 0 | ± | 0 | 0 | ± | 0 | 0 | ± | 0 |
| *Colpomenia sinuosa* | 0 | ± | 0.01 | 0 | ± | 0 | 0 | ± | 0 | 0.05 | ± | 0.09 | 0.08 | ± | 0.10 | 0.10 | ± | 0.18 |
| *Cutleria spp.* | 0 | ± | 0 | 0 | ± | 0 | 0 | ± | 0 | 0 | ± | 0 | 0 | ± | 0 | 0 | ± | 0 |
| *Cystoseira compressa* | 0 | ± | 0 | 0 | ± | 0 | 0 | ± | 0 | 0 | ± | 0 | 0 | ± | 0 | 0 | ± | 0 |
| *Cystoseira ericaefolia* | 120.15 | ± | 55.70 | 73.53 | ± | 22.54 | 149.09 | ± | 32.52 | 92.36 | ± | 21.06 | 37.40 | ± | 8.80 | 180.75 | ± | 69.96 |
| *Cystoseira mauritanica* | 0 | ± | 0 | 0 | ± | 0 | 0 | ± | 0 | 0 | ± | 0 | 0 | ± | 0 | 0 | ± | 0 |
| *Dictyota dichotoma* | 0 | ± | 0 | 0 | ± | 0 | 0.03 | ± | 0.05 | 0.08 | ± | 0.17 | 0 | ± | 0 | 0.09 | ± | 0.15 |
| *Ectocarpales* | 0.10 | ± | 0.12 | 0 | ± | 0.01 | 0.03 | ± | 0.03 | 0 | ± | 0 | 0 | ± | 0 | 0 | ± | 0 |
| *Halopteris filicina* | 0 | ± | 0 | 0 | ± | 0 | 0 | ± | 0 | 0 | ± | 0 | 0 | ± | 0 | 0 | ± | 0 |
| *Halopteris scoparia* | 0.49 | ± | 0.49 | 0.04 | ± | 0.08 | 1.28 | ± | 2.11 | 0.10 | ± | 0.16 | 0.32 | ± | 0.33 | 0.05 | ± | 0.05 |
| *Padina pavonia* | 0 | ± | 0 | 0.02 | ± | 0.03 | 0 | ± | 0 | 0.06 | ± | 0.12 | 0 | ± | 0 | 0 | ± | 0 |
| *Ralfsia verrucosa* | 1.25 | ± | 2.50 | 0 | ± | 0 | 0 | ± | 0 | 0 | ± | 0 | 0 | ± | 0 | 0 | ± | 0 |
| *Sargassum vulgare* | 0 | ± | 0 | 0 | ± | 0 | 0 | ± | 0 | 0 | ± | 0 | 0 | ± | 0 | 0 | ± | 0 |
| *Scytosiphon dotyi* | 0 | ± | 0 | 0 | ± | 0 | 0 | ± | 0 | 0 | ± | 0 | 0 | ± | 0 | 0 | ± | 0 |
| *Sphacelaria* cf. *cirrosa* | 0 | ± | 0 | 0 | ± | 0 | 0 | ± | 0 | 0.01 | ± | 0.01 | 0 | ± | 0 | 0 | ± | 0 |
| *Sphacelaria fusca* | 0.02 | ± | 0.05 | 0 | ± | 0 | 0 | ± | 0 | 0.05 | ± | 0.10 | 0.04 | ± | 0.08 | 0 | ± | 0 |
| *Sphacelaria tribuloides* | 0 | ± | 0 | 0 | ± | 0 | 0 | ± | 0 | 0 | ± | 0 | 0 | ± | 0 | 0 | ± | 0 |
| *Taonia atomaria* | 0 | ± | 0 | 0 | ± | 0 | 0 | ± | 0 | 0 | ± | 0 | 0 | ± | 0 | 0 | ± | 0 |
| *Acrosorium ciliolatum* | 0 | ± | 0 | 0 | ± | 0 | 0 | ± | 0 | 0 | ± | 0 | 0 | ± | 0 | 0 | ± | 0 |
| *Aglaothamnion gallicum* | 0.06 | ± | 0.12 | 0 | ± | 0 | 0.03 | ± | 0.04 | 0 | ± | 0 | 0 | ± | 0 | 0 | ± | 0 |
| *Aglaothamnion hookeri* | 0 | ± | 0.01 | 0 | ± | 0 | 0 | ± | 0 | 0 | ± | 0 | 0 | ± | 0 | 0 | ± | 0 |
| *Amphiroa beauvoisii* | 0.08 | ± | 0.11 | 0 | ± | 0 | 0 | ± | 0 | 0 | ± | 0 | 0 | ± | 0.01 | 0 | ± | 0 |
| *Amphiroa cryptarthrodia* | 0 | ± | 0 | 0 | ± | 0 | 0 | ± | 0 | 0 | ± | 0 | 0 | ± | 0 | 0 | ± | 0 |
| *Amphiroa rigida* | 0.24 | ± | 0.48 | 0 | ± | 0 | 0 | ± | 0 | 0 | ± | 0.01 | 0 | ± | 0 | 0.29 | ± | 0.50 |
| *Anotrichium tenue* | 0 | ± | 0 | 0 | ± | 0 | 0 | ± | 0 | 0 | ± | 0 | 0 | ± | 0 | 0 | ± | 0 |
| *Anfeltiopsis devoniensis* | 0 | ± | 0 | 0 | ± | 0.01 | 0 | ± | 0 | 0 | ± | 0 | 0 | ± | 0 | 0 | ± | 0 |
| *Anthithamniella elegans* | 0 | ± | 0 | 0 | ± | 0 | 0 | ± | 0 | 0 | ± | 0 | 0.04 | ± | 0.08 | 0 | ± | 0 |
| *Antithamnionella boergesenii* | 0 | ± | 0 | 0.08 | ± | 0.16 | 0 | ± | 0 | 0 | ± | 0 | 0 | ± | 0 | 0 | ± | 0 |
| *Anthithmanion cruciatum* | 0 | ± | 0 | 0 | ± | 0 | 0 | ± | 0 | 0 | ± | 0 | 0 | ± | 0 | 0 | ± | 0 |
| *Anthithmanion decipiens* | 0 | ± | 0 | 0 | ± | 0 | 0 | ± | 0 | 0 | ± | 0 | 0 | ± | 0 | 0 | ± | 0 |
| *Asparagopsis armata* | 0 | ± | 0 | 0 | ± | 0 | 0 | ± | 0 | 0 | ± | 0 | 0.05 | ± | 0.08 | 0 | ± | 0 |
| *Asparagopsis taxiformis* | 0 | ± | 0 | 0 | ± | 0 | 0 | ± | 0 | 0 | ± | 0 | 0 | ± | 0 | 0 | ± | 0 |
| *Falkenbergia rufolanosa* | 0 | ± | 0 | 0 | ± | 0 | 0 | ± | 0 | 0 | ± | 0 | 0.02 | ± | 0.04 | 0 | ± | 0 |
| *Bonnemaissonia asparagoides* | 0 | ± | 0 | 0 | ± | 0 | 0 | ± | 0 | 0.04 | ± | 0.08 | 0 | ± | 0 | 0 | ± | 0 |
| *Boergeseniella fruticulosa* | 0.30 | ± | 0.60 | 3.12 | ± | 5.71 | 0.15 | ± | 0.15 | 1.33 | ± | 2.65 | 0 | ± | 0 | 0 | ± | 0 |
| *Callithamnion corymbosum* | 0 | ± | 0 | 0.09 | ± | 0.15 | 0.04 | ± | 0.07 | 0 | ± | 0 | 0 | ± | 0 | 0 | ± | 0 |
| *Callithamnion granulatum* | 0 | ± | 0 | 0.05 | ± | 0.07 | 0 | ± | 0 | 0 | ± | 0.01 | 0.12 | ± | 0.05 | 0 | ± | 0 |
| *Callithamnion tetragonum* | 0 | ± | 0 | 0 | ± | 0 | 0 | ± | 0 | 0 | ± | 0 | 0 | ± | 0 | 0 | ± | 0 |
| *Caulacanthus ustulatus* | 0 | ± | 0 | 0 | ± | 0.01 | 0 | ± | 0 | 0 | ± | 0 | 0 | ± | 0 | 0 | ± | 0 |
| *Ceramium brevizonatum* | 0 | ± | 0 | 0 | ± | 0 | 0 | ± | 0 | 0 | ± | 0 | 0 | ± | 0 | 0 | ± | 0 |
| *Centroceras clavatum* | 0 | ± | 0 | 0 | ± | 0 | 0 | ± | 0 | 0 | ± | 0 | 0 | ± | 0 | 0 | ± | 0 |
| *Ceramium echionotum* | 0 | ± | 0 | 0 | ± | 0.01 | 0 | ± | 0 | 0 | ± | 0 | 1.15 | ± | 1.88 | 0 | ± | 0 |
| *Ceramium* cf *deslongchampsii* | 0 | ± | 0 | 0 | ± | 0 | 0 | ± | 0 | 0 | ± | 0 | 0 | ± | 0 | 0 | ± | 0 |
| *Ceramium diaphanum* | 0 | ± | 0 | 0 | ± | 0 | 0 | ± | 0 | 0 | ± | 0 | 0 | ± | 0 | 0 | ± | 0 |
| *Ceramium ciliatum* | 0.01 | ± | 0.02 | 0.09 | ± | 0.16 | 0.01 | ± | 0.02 | 0.01 | ± | 0.03 | 0.27 | ± | 0.27 | 0 | ± | 0 |
| *Ceramium* cf *cimbricum* | 0 | ± | 0 | 0 | ± | 0 | 0 | ± | 0 | 0 | ± | 0 | 0 | ± | 0 | 0 | ± | 0 |
| *Ceramium* cf *tenerrimun* | 0 | ± | 0 | 0 | ± | 0 | 0 | ± | 0 | 0 | ± | 0 | 0 | ± | 0 | 0 | ± | 0 |
| *Gayliella flaccida* | 0.18 | ± | 0.22 | 0 | ± | 0 | 0 | ± | 0 | 0 | ± | 0 | 0.69 | ± | 0.65 | 0 | ± | 0 |
| *Ceramium secundatum* | 4.06 | ± | 6.57 | 0.69 | ± | 0.91 | 0.13 | ± | 0.08 | 0 | ± | 0 | 0.15 | ± | 0.06 | 0.03 | ± | 0.05 |
| *Ceramium* cf *strictum* | 0 | ± | 0 | 0 | ± | 0 | 0 | ± | 0 | 0 | ± | 0 | 0 | ± | 0 | 0 | ± | 0 |
| *Ceramium polyceras* | 0.02 | ± | 0.05 | 0.01 | ± | 0.01 | 0 | ± | 0 | 0 | ± | 0 | 0 | ± | 0 | 0 | ± | 0 |
| *Champia parvula* | 0 | ± | 0 | 0 | ± | 0 | 0 | ± | 0 | 0 | ± | 0 | 0 | ± | 0 | 0 | ± | 0 |
| *Chondracanthus acicularis* | 7.74 | ± | 9.31 | 1.15 | ± | 1.04 | 0 | ± | 0 | 1.32 | ± | 2.65 | 1.01 | ± | 0.48 | 0 | ± | 0 |
| *Chondracanthus teedei* | 0.30 | ± | 0.60 | 0 | ± | 0 | 0 | ± | 0 | 0 | ± | 0 | 0 | ± | 0 | 0 | ± | 0 |
| *Chondria capillaris* | 0 | ± | 0 | 0 | ± | 0 | 0 | ± | 0 | 0 | ± | 0 | 0 | ± | 0 | 0 | ± | 0 |
| *Chondria coerulescens* | 0 | ± | 0 | 0 | ± | 0 | 0 | ± | 0 | 0 | ± | 0 | 0.21 | ± | 0.19 | 0 | ± | 0 |
| *Chondra dasyphylla* | 0 | ± | 0 | 0 | ± | 0 | 0 | ± | 0 | 0 | ± | 0 | 0 | ± | 0 | 0 | ± | 0 |
| *Chondrophycus tenerrimus* | 0 | ± | 0 | 0 | ± | 0 | 0 | ± | 0 | 0 | ± | 0 | 0 | ± | 0 | 0 | ± | 0 |
| *Corallina* spp. | 5.59 | ± | 4.87 | 22.58 | ± | 10.76 | 5.02 | ± | 4.69 | 6.46 | ± | 8.19 | 1.42 | ± | 0.72 | 0.01 | ± | 0.02 |
| *Crouania attenuata* | 0 | ± | 0 | 0 | ± | 0 | 0 | ± | 0 | 0 | ± | 0 | 0 | ± | 0 | 0 | ± | 0 |
| *Cryptopleura ramosa* | 0 | ± | 0 | 0 | ± | 0 | 0 | ± | 0 | 0 | ± | 0 | 0 | ± | 0 | 0 | ± | 0 |
| *Dasya* spp. | 0.25 | ± | 0.28 | 0 | ± | 0 | 0.04 | ± | 0.07 | 0.05 | ± | 0.10 | 0.15 | ± | 0.14 | 0 | ± | 0 |
| *Drachiella spectabilis* | 0 | ± | 0 | 0 | ± | 0 | 0.04 | ± | 0.07 | 0 | ± | 0 | 0 | ± | 0 | 0 | ± | 0 |
| *Erythrotrichia carnea* | 0.04 | ± | 0.04 | 0 | ± | 0 | 0.01 | ± | 0.02 | 0 | ± | 0 | 0.02 | ± | 0.03 | 0 | ± | 0 |
| *Erythrotrichia bertholdii* | 0.01 | ± | 0.02 | 0 | ± | 0 | 0 | ± | 0 | 0 | ± | 0 | 0 | ± | 0 | 0 | ± | 0 |
| *Gastroclonium clavatum* | 0.04 | ± | 0.07 | 0 | ± | 0 | 4.04 | ± | 6.70 | 0 | ± | 0 | 0 | ± | 0 | 0 | ± | 0 |
| *Gastroclonium reflexum* | 0.05 | ± | 0.10 | 0 | ± | 0 | 0.02 | ± | 0.03 | 0 | ± | 0.01 | 0 | ± | 0 | 0 | ± | 0 |
| *Gastroclonium ovatum* | 0 | ± | 0 | 0 | ± | 0 | 0 | ± | 0 | 0 | ± | 0 | 0 | ± | 0 | 0 | ± | 0 |
| *Gelidium crinale* | 0 | ± | 0 | 0 | ± | 0 | 0 | ± | 0 | 0 | ± | 0 | 0.05 | ± | 0.09 | 0 | ± | 0 |
| *Gelidium spinosum* | 6.03 | ± | 7.03 | 1.45 | ± | 2.40 | 0 | ± | 0 | 0.06 | ± | 0.11 | 0 | ± | 0 | 0 | ± | 0 |

**Table S2 (cont.).-** Mean abundance (gr) of taxa at each sampling site. Mean ± Standard Deviation.

| **Taxa** | **SJ** | | | **Ne** | | | **Al** | | | **Mo** | | | **Pa** | | | **ST** | | |
| --- | --- | --- | --- | --- | --- | --- | --- | --- | --- | --- | --- | --- | --- | --- | --- | --- | --- | --- |
| *Cyanophyta* | 0 | ± | 0 | 0 | ± | 0 | 0 | ± | 0 | 0 | ± | 0 | 0 | ± | 0.01 | 0 | ± | 0 |
| *Cladostephus spongiosus* | 0 | ± | 0 | 0 | ± | 0 | 0.01 | ± | 0.03 | 0 | ± | 0 | 0 | ± | 0 | 0 | ± | 0 |
| *Colpomenia sinuosa* | 0.01 | ± | 0.03 | 0 | ± | 0 | 0 | ± | 0 | 0 | ± | 0 | 0 | ± | 0 | 0 | ± | 0 |
| *Cutleria spp.* | 0 | ± | 0 | 0 | ± | 0 | 0 | ± | 0 | 0.01 | ± | 0.02 | 0 | ± | 0 | 0 | ± | 0 |
| *Cystoseira compressa* | 0 | ± | 0 | 0 | ± | 0 | 0 | ± | 0 | 0.42 | ± | 0.84 | 0 | ± | 0 | 0 | ± | 0 |
| *Cystoseira ericaefolia* | 128.41 | ± | 70.87 | 95.35 | ± | 32.55 | 96.39 | ± | 36.55 | 102.11 | ± | 72.72 | 108.80 | ± | 40.01 | 96.06 | ± | 114.20 |
| *Cystoseira mauritanica* | 0 | ± | 0 | 0 | ± | 0 | 0 | ± | 0 | 0 | ± | 0 | 0 | ± | 0 | 0 | ± | 0 |
| *Dictyota dichotoma* | 0 | ± | 0 | 0 | ± | 0 | 0.01 | ± | 0.02 | 0 | ± | 0 | 0.60 | ± | 0.60 | 0 | ± | 0.01 |
| *Ectocarpales* | 0 | ± | 0 | 0 | ± | 0 | 0 | ± | 0 | 0 | ± | 0 | 0 | ± | 0 | 0 | ± | 0 |
| *Halopteris filicina* | 0 | ± | 0 | 0 | ± | 0 | 0 | ± | 0 | 0 | ± | 0 | 0 | ± | 0 | 0 | ± | 0 |
| *Halopteris scoparia* | 0.02 | ± | 0.03 | 0.07 | ± | 0.06 | 0.01 | ± | 0.01 | 9.23 | ± | 6.43 | 0 | ± | 0.01 | 0 | ± | 0 |
| *Padina pavonia* | 0 | ± | 0 | 0 | ± | 0 | 0 | ± | 0 | 0 | ± | 0 | 0 | ± | 0 | 0.03 | ± | 0.03 |
| *Ralfsia verrucosa* | 0 | ± | 0 | 0 | ± | 0 | 0 | ± | 0 | 0 | ± | 0 | 0 | ± | 0 | 0 | ± | 0 |
| *Sargassum vulgare* | 0 | ± | 0 | 1.63 | ± | 2.82 | 0 | ± | 0 | 0 | ± | 0 | 0 | ± | 0 | 0 | ± | 0 |
| *Scytosiphon dotyi* | 0 | ± | 0 | 0 | ± | 0 | 0 | ± | 0 | 0 | ± | 0 | 0 | ± | 0 | 0 | ± | 0 |
| *Sphacelaria* cf. *cirrosa* | 0 | ± | 0 | 0.05 | ± | 0.05 | 0 | ± | 0 | 0 | ± | 0 | 0.32 | ± | 0.50 | 0.01 | ± | 0.01 |
| *Sphacelaria fusca* | 0 | ± | 0 | 0 | ± | 0 | 0 | ± | 0 | 0 | ± | 0 | 0 | ± | 0 | 0 | ± | 0 |
| *Sphacelaria tribuloides* | 0.01 | ± | 0.01 | 0 | ± | 0 | 0 | ± | 0 | 0.09 | ± | 0.12 | 0 | ± | 0 | 0 | ± | 0 |
| *Taonia atomaria* | 0 | ± | 0 | 0 | ± | 0 | 0 | ± | 0 | 0 | ± | 0 | 0 | ± | 0 | 0 | ± | 0 |
| *Acrosorium ciliolatum* | 0 | ± | 0 | 0 | ± | 0 | 0 | ± | 0 | 0 | ± | 0 | 0 | ± | 0 | 0 | ± | 0 |
| *Aglaothamnion gallicum* | 0 | ± | 0 | 0 | ± | 0 | 0 | ± | 0 | 0 | ± | 0 | 0 | ± | 0 | 0 | ± | 0 |
| *Aglaothamnion hookeri* | 0 | ± | 0 | 0 | ± | 0 | 0 | ± | 0 | 0.05 | ± | 0.12 | 0 | ± | 0 | 0 | ± | 0 |
| *Amphiroa beauvoisii* | 0 | ± | 0 | 0.02 | ± | 0.03 | 0 | ± | 0 | 6.80 | ± | 13.53 | 0 | ± | 0 | 0 | ± | 0 |
| *Amphiroa cryptarthrodia* | 0 | ± | 0 | 0 | ± | 0 | 0 | ± | 0 | 0 | ± | 0 | 0.19 | ± | 0.31 | 0 | ± | 0 |
| *Amphiroa rigida* | 0.02 | ± | 0.03 | 0 | ± | 0 | 0 | ± | 0 | 0 | ± | 0 | 0 | ± | 0 | 0.03 | ± | 0.03 |
| *Anotrichium tenue* | 0 | ± | 0 | 0 | ± | 0 | 0 | ± | 0 | 0 | ± | 0 | 0 | ± | 0 | 0.14 | ± | 0.22 |
| *Anfeltiopsis devoniensis* | 0 | ± | 0 | 0 | ± | 0 | 0 | ± | 0 | 0 | ± | 0 | 0 | ± | 0 | 0 | ± | 0 |
| *Anthithamniella elegans* | 0 | ± | 0 | 0 | ± | 0 | 0 | ± | 0 | 0 | ± | 0 | 0 | ± | 0 | 0 | ± | 0 |
| *Antithamnionella boergesenii* | 0 | ± | 0 | 0 | ± | 0 | 0 | ± | 0 | 0 | ± | 0 | 0 | ± | 0 | 0 | ± | 0 |
| *Anthithmanion cruciatum* | 0.01 | ± | 0.01 | 0 | ± | 0 | 0 | ± | 0 | 0 | ± | 0 | 0 | ± | 0 | 0 | ± | 0 |
| *Anthithmanion decipiens* | 0 | ± | 0 | 0 | ± | 0 | 0 | ± | 0 | 0 | ± | 0 | 0 | ± | 0 | 0 | ± | 0 |
| *Asparagopsis armata* | 0 | ± | 0 | 0 | ± | 0 | 0 | ± | 0 | 0 | ± | 0 | 0 | ± | 0 | 0 | ± | 0 |
| *Asparagopsis taxiformis* | 0 | ± | 0 | 0 | ± | 0 | 0 | ± | 0 | 0 | ± | 0 | 0 | ± | 0 | 0 | ± | 0 |
| *Falkenbergia rufolanosa* | 0 | ± | 0 | 0.01 | ± | 0.01 | 0 | ± | 0 | 0 | ± | 0 | 0 | ± | 0 | 0 | ± | 0 |
| *Bonnemaissonia asparagoides* | 0 | ± | 0 | 0 | ± | 0 | 0 | ± | 0 | 0 | ± | 0 | 0 | ± | 0 | 0 | ± | 0 |
| *Boergeseniella fruticulosa* | 0 | ± | 0 | 0 | ± | 0 | 0.27 | ± | 0.35 | 1.44 | ± | 2.17 | 0.37 | ± | 0.63 | 0 | ± | 0 |
| *Callithamnion corymbosum* | 0.03 | ± | 0.04 | 0 | ± | 0 | 0 | ± | 0 | 0 | ± | 0 | 0 | ± | 0 | 0 | ± | 0 |
| *Callithamnion granulatum* | 0 | ± | 0 | 0 | ± | 0 | 0 | ± | 0 | 0 | ± | 0 | 0.04 | ± | 0.07 | 0 | ± | 0.01 |
| *Callithamnion tetragonum* | 0 | ± | 0 | 0 | ± | 0 | 0 | ± | 0 | 0 | ± | 0 | 0 | ± | 0 | 0 | ± | 0 |
| *Caulacanthus ustulatus* | 0 | ± | 0 | 0 | ± | 0 | 0 | ± | 0 | 0 | ± | 0 | 0 | ± | 0 | 0 | ± | 0 |
| *Ceramium brevizonatum* | 0 | ± | 0 | 0 | ± | 0 | 0 | ± | 0 | 0 | ± | 0 | 0 | ± | 0 | 0 | ± | 0 |
| *Centroceras clavatum* | 0 | ± | 0 | 0 | ± | 0 | 0 | ± | 0 | 0 | ± | 0 | 0 | ± | 0 | 0 | ± | 0 |
| *Ceramium echionotum* | 0 | ± | 0 | 0 | ± | 0 | 0 | ± | 0 | 0 | ± | 0 | 0 | ± | 0 | 0 | ± | 0 |
| *Ceramium* cf *deslongchampsii* | 0 | ± | 0 | 0 | ± | 0 | 0 | ± | 0 | 0 | ± | 0 | 0 | ± | 0 | 0 | ± | 0 |
| *Ceramium diaphanum* | 0 | ± | 0 | 0 | ± | 0 | 0 | ± | 0 | 0 | ± | 0 | 0 | ± | 0 | 0 | ± | 0 |
| *Ceramium ciliatum* | 0 | ± | 0.01 | 0 | ± | 0 | 0 | ± | 0 | 0.35 | ± | 0.39 | 0 | ± | 0 | 0 | ± | 0 |
| *Ceramium* cf *cimbricum* | 0 | ± | 0 | 0 | ± | 0 | 0 | ± | 0 | 0.07 | ± | 0.08 | 0 | ± | 0 | 0 | ± | 0 |
| *Ceramium* cf *tenerrimun* | 0 | ± | 0 | 0 | ± | 0 | 0 | ± | 0.01 | 0 | ± | 0 | 0.02 | ± | 0.03 | 0.02 | ± | 0.01 |
| *Gayliella flaccida* | 0.01 | ± | 0.01 | 0 | ± | 0 | 0 | ± | 0.01 | 0.07 | ± | 0.11 | 0.05 | ± | 0.08 | 0.01 | ± | 0.01 |
| *Ceramium secundatum* | 0.60 | ± | 0.43 | 0 | ± | 0 | 0.06 | ± | 0.05 | 0.30 | ± | 0.21 | 0.02 | ± | 0.03 | 0.11 | ± | 0.17 |
| *Ceramium* cf *strictum* | 0 | ± | 0 | 0 | ± | 0 | 0 | ± | 0 | 0 | ± | 0 | 0 | ± | 0 | 0 | ± | 0 |
| *Ceramium polyceras* | 0 | ± | 0 | 0.04 | ± | 0.06 | 0 | ± | 0 | 0 | ± | 0 | 0 | ± | 0 | 0 | ± | 0 |
| *Champia parvula* | 0 | ± | 0 | 0.07 | ± | 0.14 | 0 | ± | 0 | 0.04 | ± | 0.08 | 0 | ± | 0 | 0 | ± | 0 |
| *Chondracanthus acicularis* | 0 | ± | 0 | 0 | ± | 0 | 0 | ± | 0 | 0.06 | ± | 0.14 | 0 | ± | 0 | 0 | ± | 0 |
| *Chondracanthus teedei* | 0 | ± | 0 | 0 | ± | 0 | 0 | ± | 0 | 0 | ± | 0 | 0 | ± | 0 | 0 | ± | 0 |
| *Chondria capillaris* | 0 | ± | 0 | 0 | ± | 0 | 0.02 | ± | 0.03 | 0 | ± | 0 | 0.07 | ± | 0.13 | 0 | ± | 0 |
| *Chondria coerulescens* | 0 | ± | 0 | 0 | ± | 0 | 0 | ± | 0 | 0 | ± | 0 | 0 | ± | 0 | 0 | ± | 0 |
| *Chondra dasyphylla* | 0 | ± | 0 | 0 | ± | 0 | 0 | ± | 0 | 0 | ± | 0 | 0 | ± | 0.01 | 0 | ± | 0 |
| *Chondrophycus tenerrimus* | 0 | ± | 0 | 0 | ± | 0 | 0 | ± | 0 | 4.02 | ± | 8.04 | 23.36 | ± | 37.63 | 0 | ± | 0 |
| *Corallina* spp. | 0.73 | ± | 0.96 | 0 | ± | 0 | 0.17 | ± | 0.29 | 0.60 | ± | 0.42 | 0 | ± | 0 | 21.42 | ± | 29.84 |
| *Crouania attenuata* | 0.01 | ± | 0.01 | 0 | ± | 0 | 0 | ± | 0 | 0 | ± | 0 | 0 | ± | 0 | 0 | ± | 0 |
| *Cryptopleura ramosa* | 0 | ± | 0 | 0 | ± | 0 | 0 | ± | 0 | 0 | ± | 0 | 0 | ± | 0 | 0 | ± | 0 |
| *Dasya* spp. | 0 | ± | 0 | 0.28 | ± | 0.36 | 0 | ± | 0 | 0.61 | ± | 1.10 | 0.11 | ± | 0.17 | 0 | ± | 0 |
| *Drachiella spectabilis* | 0 | ± | 0 | 0 | ± | 0 | 0 | ± | 0 | 0 | ± | 0 | 0 | ± | 0 | 0 | ± | 0 |
| *Erythrotrichia carnea* | 0 | ± | 0 | 0.04 | ± | 0.05 | 0 | ± | 0 | 0 | ± | 0 | 0 | ± | 0 | 0 | ± | 0 |
| *Erythrotrichia bertholdii* | 0 | ± | 0 | 0 | ± | 0 | 0 | ± | 0 | 0 | ± | 0 | 0 | ± | 0 | 0 | ± | 0 |
| *Gastroclonium clavatum* | 0.06 | ± | 0.08 | 0 | ± | 0 | 0.01 | ± | 0.02 | 0.03 | ± | 0.06 | 0 | ± | 0 | 0.28 | ± | 0.25 |
| *Gastroclonium reflexum* | 0 | ± | 0 | 0 | ± | 0 | 0 | ± | 0 | 0.02 | ± | 0.04 | 0 | ± | 0 | 0 | ± | 0 |
| *Gastroclonium ovatum* | 0 | ± | 0 | 0 | ± | 0 | 0 | ± | 0 | 0 | ± | 0 | 0 | ± | 0 | 0 | ± | 0 |
| *Gelidium crinale* | 0.46 | ± | 0.79 | 0 | ± | 0 | 0 | ± | 0 | 0.30 | ± | 0.61 | 3.82 | ± | 5.15 | 0 | ± | 0 |
| *Gelidium spinosum* | 0 | ± | 0 | 0 | ± | 0 | 0 | ± | 0 | 0 | ± | 0 | 0 | ± | 0 | 0 | ± | 0 |

**Table S2 (cont.).-** Mean abundance (gr) of taxa at each sampling site. Mean ± Standard Deviation.

| **Taxa** | **Mi** | | | **TG** | | | **CH** | | | **TQ** | | | **Ar** | | | **Ca** | | |
| --- | --- | --- | --- | --- | --- | --- | --- | --- | --- | --- | --- | --- | --- | --- | --- | --- | --- | --- |
| *Gelidium pusillum* | 0 | ± | 0 | 0 | ± | 0 | 0 | ± | 0 | 0.08 | ± | 0.08 | 0.15 | ± | 0.15 | 0 | ± | 0 |
| *Gracilaria* cf *armata* | 0 | ± | 0 | 0 | ± | 0 | 0 | ± | 0 | 0 | ± | 0 | 0 | ± | 0 | 0 | ± | 0 |
| *Grateloupia subpectinata* | 0 | ± | 0 | 0 | ± | 0 | 0 | ± | 0 | 0 | ± | 0 | 0 | ± | 0 | 0 | ± | 0 |
| *Griffithsia* spp. | 0.05 | ± | 0.06 | 0 | ± | 0 | 0.01 | ± | 0.02 | 0 | ± | 0 | 0 | ± | 0 | 0 | ± | 0 |
| *Gymnogongrus crenulatus* | 0 | ± | 0 | 0 | ± | 0 | 0 | ± | 0 | 0 | ± | 0 | 0 | ± | 0 | 0 | ± | 0 |
| *Gymnogongrus griffithsiae* | 0 | ± | 0 | 0 | ± | 0 | 0 | ± | 0 | 0 | ± | 0 | 0 | ± | 0 | 0 | ± | 0 |
| *Haliptilon squamatum* | 0 | ± | 0 | 0 | ± | 0 | 0 | ± | 0 | 0 | ± | 0 | 0 | ± | 0 | 0 | ± | 0 |
| *Haliptilon virgatum* | 0 | ± | 0 | 0.02 | ± | 0.05 | 1.24 | ± | 2.14 | 0.29 | ± | 0.50 | 0 | ± | 0 | 0.02 | ± | 0.02 |
| *Halopithys incurva* | 6.83 | ± | 11.19 | 0 | ± | 0 | 0.06 | ± | 0.06 | 0 | ± | 0 | 0 | ± | 0 | 0 | ± | 0 |
| *Halurus flosculosus* | 3.80 | ± | 3.03 | 0 | ± | 0 | 0 | ± | 0 | 0 | ± | 0 | 0 | ± | 0 | 0 | ± | 0 |
| *Haraldia lenormandii* | 0 | ± | 0 | 0 | ± | 0 | 0 | ± | 0 | 0 | ± | 0 | 0 | ± | 0 | 0 | ± | 0 |
| *Haraldiophyllum bonnemaisonii* | 0 | ± | 0 | 0 | ± | 0 | 0 | ± | 0 | 0 | ± | 0 | 0 | ± | 0 | 0 | ± | 0 |
| *Hildenbrandia rubra* | 0.01 | ± | 0.03 | 0.02 | ± | 0.03 | 0 | ± | 0 | 0 | ± | 0 | 0 | ± | 0 | 0 | ± | 0 |
| *Herposiphonia secunda* | 0.63 | ± | 0.60 | 0.23 | ± | 0.14 | 0.01 | ± | 0.02 | 0.21 | ± | 0.23 | 0 | ± | 0 | 0 | ± | 0 |
| *Heterosiphonia crispella* | 0 | ± | 0 | 0 | ± | 0 | 0 | ± | 0 | 0 | ± | 0 | 0 | ± | 0 | 0 | ± | 0 |
| *Hypnea musciformis* | 0 | ± | 0 | 0 | ± | 0 | 3.39 | ± | 4.83 | 0 | ± | 0 | 0 | ± | 0 | 0 | ± | 0 |
| *Hypoglossum hypoglosoides* | 0.47 | ± | 0.58 | 0 | ± | 0 | 0.15 | ± | 0.26 | 0 | ± | 0 | 0 | ± | 0 | 0 | ± | 0 |
| *Jania longifurca* | 0 | ± | 0 | 0 | ± | 0 | 0 | ± | 0 | 0 | ± | 0 | 0 | ± | 0 | 0 | ± | 0 |
| *Jania rubens* | 16.28 | ± | 12.90 | 0.65 | ± | 0.56 | 26.24 | ± | 0.20 | 5.22 | ± | 8.32 | 0.56 | ± | 0.73 | 0.45 | ± | 0.78 |
| *Lejolisia* sp. | 0 | ± | 0 | 0 | ± | 0 | 0 | ± | 0 | 0 | ± | 0 | 0 | ± | 0 | 0 | ± | 0 |
| *Laurencia obtusa* | 0 | ± | 0 | 0.07 | ± | 0.14 | 0 | ± | 0 | 0 | ± | 0 | 0 | ± | 0.01 | 0 | ± | 0 |
| *Lithophyllum corallinae* | 0.02 | ± | 0.03 | 0.03 | ± | 0.06 | 0 | ± | 0 | 0 | ± | 0 | 0 | ± | 0 | 0 | ± | 0 |
| *Lithophyllum incrustans* | 0.11 | ± | 0.13 | 0.15 | ± | 0.10 | 0.15 | ± | 0.13 | 0 | ± | 0 | 0.18 | ± | 0.13 | 0.10 | ± | 0.09 |
| *Lithophyllum lichenoides* | 0 | ± | 0 | 0 | ± | 0 | 0 | ± | 0 | 0 | ± | 0 | 0 | ± | 0 | 0 | ± | 0 |
| *Lithophyllum pustulatum* | 0.02 | ± | 0.05 | 0.05 | ± | 0.05 | 0.02 | ± | 0.02 | 0 | ± | 0 | 0.02 | ± | 0.02 | 0.11 | ± | 0.14 |
| *Lomentaria articulata* | 0 | ± | 0 | 0 | ± | 0 | 0 | ± | 0 | 0 | ± | 0 | 0 | ± | 0 | 0 | ± | 0 |
| *Lomentaria catenata* | 0 | ± | 0 | 0 | ± | 0 | 0 | ± | 0 | 0 | ± | 0 | 0 | ± | 0 | 0 | ± | 0 |
| *Lophosiphonia reptabunda* | 0 | ± | 0 | 0 | ± | 0 | 0 | ± | 0 | 0 | ± | 0 | 0 | ± | 0 | 0 | ± | 0 |
| *Neogoniolithon brassica-florida* | 0.05 | ± | 0.10 | 0 | ± | 0 | 0 | ± | 0 | 0 | ± | 0 | 0 | ± | 0 | 0 | ± | 0 |
| *Mesophyllum expansum* | 0 | ± | 0 | 0 | ± | 0 | 0 | ± | 0 | 0 | ± | 0 | 0 | ± | 0 | 0 | ± | 0 |
| *Mesophyllum lichenoides* | 0.62 | ± | 1.24 | 0 | ± | 0 | 0 | ± | 0 | 0 | ± | 0 | 0 | ± | 0 | 0 | ± | 0 |
| *Monosporus pedicellatus* | 0 | ± | 0 | 0 | ± | 0 | 0 | ± | 0.01 | 0 | ± | 0 | 0 | ± | 0 | 0 | ± | 0 |
| *Ophiocladus simplicimus* | 24.89 | ± | 18.56 | 0 | ± | 0 | 0 | ± | 0 | 0 | ± | 0 | 0 | ± | 0 | 0 | ± | 0 |
| *Osmundea hybrida* | 5.05 | ± | 9.35 | 0 | ± | 0 | 0 | ± | 0 | 0.11 | ± | 0.12 | 0 | ± | 0 | 0 | ± | 0 |
| *Osmundea pinnatifida* | 0 | ± | 0 | 0 | ± | 0 | 0.19 | ± | 0.33 | 0 | ± | 0 | 0 | ± | 0 | 0 | ± | 0 |
| *Peyssonelia coriacea* | 0 | ± | 0 | 0 | ± | 0 | 0 | ± | 0 | 0 | ± | 0 | 0 | ± | 0 | 0 | ± | 0 |
| *Peyssonnelia dubyi* | 0 | ± | 0 | 0.18 | ± | 0.15 | 0 | ± | 0 | 0 | ± | 0 | 0 | ± | 0 | 0 | ± | 0 |
| *Pleonosporium borreri* | 0 | ± | 0 | 0 | ± | 0 | 0 | ± | 0 | 0 | ± | 0 | 0 | ± | 0 | 0 | ± | 0 |
| *Plocamium cartilagineum* | 0.54 | ± | 0.49 | 0.14 | ± | 0.23 | 0 | ± | 0 | 0 | ± | 0 | 0 | ± | 0 | 0 | ± | 0 |
| *Polysiphonia* cf *nigra* | 13.13 | ± | 17.19 | 0 | ± | 0 | 0 | ± | 0 | 0 | ± | 0 | 0 | ± | 0 | 0 | ± | 0 |
| *Polysiphonia* spp. | 0.02 | ± | 0.04 | 0 | ± | 0 | 0.01 | ± | 0.02 | 0.15 | ± | 0.18 | 0 | ± | 0 | 0 | ± | 0 |
| *Porphyra* cf *leucosticta* | 0 | ± | 0 | 0 | ± | 0 | 0 | ± | 0 | 0 | ± | 0 | 0 | ± | 0 | 0 | ± | 0 |
| *Pterocladiella capillacea* | 0 | ± | 0 | 0 | ± | 0 | 0.01 | ± | 0.02 | 0 | ± | 0 | 0 | ± | 0 | 0.08 | ± | 0.16 |
| *Pterosiphonia ardreana* | 2.79 | ± | 2.64 | 0 | ± | 0 | 0 | ± | 0 | 0 | ± | 0 | 0 | ± | 0 | 0 | ± | 0 |
| *Pterosiphonia complanata* | 0 | ± | 0 | 0 | ± | 0 | 0.02 | ± | 0.03 | 0 | ± | 0 | 0 | ± | 0 | 0 | ± | 0 |
| *Pterosiphonia parasitica* | 0 | ± | 0 | 0 | ± | 0 | 0 | ± | 0 | 0 | ± | 0 | 0 | ± | 0 | 0 | ± | 0 |
| *Pterosiphonia pennata* | 8.20 | ± | 7.96 | 0 | ± | 0 | 0 | ± | 0 | 0.13 | ± | 0.12 | 0 | ± | 0 | 0 | ± | 0 |
| *Rhodophyllis divaricata* | 0 | ± | 0 | 0 | ± | 0 | 0.03 | ± | 0.03 | 0 | ± | 0 | 0 | ± | 0 | 0 | ± | 0 |
| *Rhodymenia ardissonei* | 0 | ± | 0 | 0 | ± | 0 | 0 | ± | 0 | 0.09 | ± | 0.17 | 0 | ± | 0 | 0 | ± | 0 |
| *Rythyplaea tinctoria* | 0 | ± | 0 | 0 | ± | 0 | 0 | ± | 0 | 0 | ± | 0 | 0 | ± | 0 | 0 | ± | 0 |
| *Solieria chordalis* | 0 | ± | 0 | 0 | ± | 0 | 0 | ± | 0.01 | 0 | ± | 0 | 0 | ± | 0 | 0 | ± | 0 |
| *Spermothamnion repens* | 0 | ± | 0 | 0 | ± | 0 | 0 | ± | 0 | 0 | ± | 0 | 0 | ± | 0 | 0 | ± | 0 |
| *Sphaerococcus coronopifolius* | 0 | ± | 0 | 0 | ± | 0 | 0 | ± | 0 | 0 | ± | 0 | 0 | ± | 0 | 0 | ± | 0 |
| *Spyridia filamentosa* | 0 | ± | 0 | 0 | ± | 0 | 0 | ± | 0 | 0 | ± | 0 | 0 | ± | 0 | 0 | ± | 0 |
| *Taenioma nanum* | 0 | ± | 0 | 0 | ± | 0 | 0 | ± | 0 | 0 | ± | 0 | 0 | ± | 0 | 0 | ± | 0 |
| *Trailliella intricata* | 0 | ± | 0 | 0 | ± | 0 | 0.02 | ± | 0.03 | 0 | ± | 0 | 0 | ± | 0 | 0 | ± | 0 |
| *Acetabularia acetabulum* | 0 | ± | 0 | 0 | ± | 0 | 0 | ± | 0 | 0 | ± | 0 | 0 | ± | 0 | 0 | ± | 0 |
| *Bryopsis cf cupressina* | 0.02 | ± | 0.03 | 0 | ± | 0 | 0 | ± | 0 | 0 | ± | 0 | 0 | ± | 0 | 0 | ± | 0 |
| *Bryopsis duplex* | 0 | ± | 0 | 0.02 | ± | 0.03 | 0 | ± | 0 | 0 | ± | 0 | 0 | ± | 0 | 0 | ± | 0 |
| *Bryopsis hypnoides* | 0 | ± | 0 | 0 | ± | 0 | 0 | ± | 0 | 0 | ± | 0 | 0 | ± | 0 | 0 | ± | 0 |
| *Chaetomorpha aerea* | 0 | ± | 0 | 0 | ± | 0 | 0 | ± | 0 | 0 | ± | 0 | 0 | ± | 0 | 0 | ± | 0 |
| *Chaetomorpha ligustica* | 0 | ± | 0 | 0 | ± | 0 | 0 | ± | 0 | 0 | ± | 0 | 0.04 | ± | 0.04 | 0 | ± | 0 |
| *Chaetomorpha mediterranea* | 0 | ± | 0 | 0 | ± | 0 | 0 | ± | 0 | 0 | ± | 0 | 0 | ± | 0 | 0 | ± | 0 |
| *Cladophora sericea* | 0 | ± | 0 | 0 | ± | 0 | 0.04 | ± | 0.06 | 0.06 | ± | 0.11 | 0.02 | ± | 0.03 | 0.02 | ± | 0.03 |
| *Cladophora hutchinsiae* | 0 | ± | 0 | 0 | ± | 0 | 0.01 | ± | 0.02 | 0 | ± | 0 | 0.32 | ± | 0.55 | 0.01 | ± | 0.01 |
| *Cladophora laetevirens* | 0.08 | ± | 0.16 | 0.02 | ± | 0.03 | 0.05 | ± | 0.05 | 0 | ± | 0 | 0.05 | ± | 0.04 | 0 | ± | 0 |
| *Cladophora prolifera* | 0.04 | ± | 0.07 | 0 | ± | 0 | 0 | ± | 0 | 0 | ± | 0 | 0.05 | ± | 0.08 | 0 | ± | 0 |
| *Codium adhaerens* | 0 | ± | 0 | 0 | ± | 0 | 0 | ± | 0 | 0 | ± | 0 | 0 | ± | 0 | 0 | ± | 0 |
| *Codium bursa* | 0 | ± | 0 | 0 | ± | 0 | 0 | ± | 0 | 0 | ± | 0 | 0 | ± | 0 | 0 | ± | 0 |
| *Codium fragile* | 0 | ± | 0 | 0 | ± | 0 | 0 | ± | 0 | 0 | ± | 0 | 0 | ± | 0 | 0 | ± | 0 |
| *Derbesia marina* | 0 | ± | 0 | 0 | ± | 0 | 0 | ± | 0 | 0 | ± | 0 | 0 | ± | 0 | 0 | ± | 0 |
| *Pedobepsia simplex* | 0 | ± | 0 | 0 | ± | 0 | 0 | ± | 0 | 0 | ± | 0 | 0 | ± | 0 | 0 | ± | 0 |
| *Ulva compressa* | 0 | ± | 0 | 0 | ± | 0 | 0.03 | ± | 0.05 | 0.09 | ± | 0.17 | 1.38 | ± | 2.36 | 0.14 | ± | 0.12 |

**Table S2 (cont.).-** Mean abundance (gr) at each sampling site. Mean ± Standard Deviation.

| **Taxa** | **He** | | | **Ri** | | | **CR** | | | **GV** | | | **Rq** | | | **Co** | | |
| --- | --- | --- | --- | --- | --- | --- | --- | --- | --- | --- | --- | --- | --- | --- | --- | --- | --- | --- |
| *Gelidium pusillum* | 0 | ± | 0 | 0.33 | ± | 0.65 | 0.49 | ± | 0.71 | 0 | ± | 0.01 | 0.04 | ± | 0.08 | 0 | ± | 0 |
| *Gracilaria* cf *armata* | 0 | ± | 0 | 0 | ± | 0 | 0 | ± | 0 | 0 | ± | 0 | 0 | ± | 0 | 0 | ± | 0 |
| *Grateloupia subpectinata* | 0 | ± | 0 | 0 | ± | 0 | 0 | ± | 0 | 0.02 | ± | 0.03 | 0 | ± | 0 | 0 | ± | 0 |
| *Griffithsia* spp. | 0 | ± | 0 | 0 | ± | 0 | 0 | ± | 0 | 0 | ± | 0 | 0.17 | ± | 0.04 | 0 | ± | 0 |
| *Gymnogongrus crenulatus* | 0.11 | ± | 0.18 | 0.02 | ± | 0.04 | 0.01 | ± | 0.01 | 0 | ± | 0 | 0 | ± | 0 | 0 | ± | 0 |
| *Gymnogongrus griffithsiae* | 0 | ± | 0 | 0 | ± | 0 | 0 | ± | 0 | 0 | ± | 0 | 0 | ± | 0 | 0.04 | ± | 0.07 |
| *Haliptilon squamatum* | 0 | ± | 0 | 0 | ± | 0 | 0 | ± | 0 | 0 | ± | 0 | 0 | ± | 0 | 0 | ± | 0 |
| *Haliptilon virgatum* | 0 | ± | 0 | 0 | ± | 0 | 0.03 | ± | 0.06 | 0.05 | ± | 0.05 | 0.47 | ± | 0.82 | 0.28 | ± | 0.50 |
| *Halopithys incurva* | 0 | ± | 0 | 0 | ± | 0 | 0 | ± | 0 | 0 | ± | 0 | 0 | ± | 0 | 0 | ± | 0 |
| *Halurus flosculosus* | 0 | ± | 0 | 0 | ± | 0 | 0 | ± | 0 | 0 | ± | 0 | 0 | ± | 0 | 0 | ± | 0 |
| *Haraldia lenormandii* | 0 | ± | 0 | 0 | ± | 0 | 0 | ± | 0 | 0 | ± | 0 | 0 | ± | 0 | 0 | ± | 0 |
| *Haraldiophyllum bonnemaisonii* | 0 | ± | 0 | 0 | ± | 0 | 0 | ± | 0 | 0 | ± | 0 | 0 | ± | 0 | 0 | ± | 0 |
| *Hildenbrandia rubra* | 0 | ± | 0 | 0.03 | ± | 0.05 | 0 | ± | 0 | 0.03 | ± | 0.05 | 0 | ± | 0 | 0 | ± | 0 |
| *Herposiphonia secunda* | 0.03 | ± | 0.02 | 0.08 | ± | 0.16 | 0.04 | ± | 0.07 | 0.06 | ± | 0.12 | 0.58 | ± | 0.65 | 0 | ± | 0 |
| *Heterosiphonia crispella* | 0 | ± | 0 | 0 | ± | 0 | 0 | ± | 0 | 0.01 | ± | 0.01 | 0 | ± | 0 | 0 | ± | 0 |
| *Hypnea musciformis* | 0 | ± | 0 | 0 | ± | 0 | 0 | ± | 0 | 0 | ± | 0 | 0.97 | ± | 1.03 | 0 | ± | 0 |
| *Hypoglossum hypoglosoides* | 0 | ± | 0 | 0 | ± | 0 | 0 | ± | 0 | 0 | ± | 0 | 0 | ± | 0 | 0 | ± | 0 |
| *Jania longifurca* | 0 | ± | 0 | 0 | ± | 0 | 0.03 | ± | 0.05 | 0 | ± | 0 | 0 | ± | 0 | 0 | ± | 0 |
| *Jania rubens* | 0.65 | ± | 0.96 | 0.48 | ± | 0.91 | 1.40 | ± | 1.40 | 2.42 | ± | 3.92 | 2.71 | ± | 1.22 | 0 | ± | 0 |
| *Lejolisia* sp. | 0 | ± | 0 | 0 | ± | 0 | 0 | ± | 0 | 0 | ± | 0 | 0 | ± | 0 | 0 | ± | 0 |
| *Laurencia obtusa* | 0 | ± | 0 | 1.64 | ± | 1.91 | 0 | ± | 0 | 0 | ± | 0 | 0 | ± | 0 | 0 | ± | 0 |
| *Lithophyllum corallinae* | 0.05 | ± | 0.08 | 0 | ± | 0 | 0 | ± | 0 | 0 | ± | 0 | 0 | ± | 0 | 0 | ± | 0 |
| *Lithophyllum incrustans* | 0.40 | ± | 0.49 | 0.31 | ± | 0.34 | 0.45 | ± | 0.44 | 0.34 | ± | 0.30 | 0.10 | ± | 0.10 | 0.97 | ± | 0.06 |
| *Lithophyllum lichenoides* | 0 | ± | 0 | 0 | ± | 0 | 0 | ± | 0 | 0 | ± | 0 | 0 | ± | 0 | 0 | ± | 0 |
| *Lithophyllum pustulatum* | 0.19 | ± | 0.19 | 0.02 | ± | 0.03 | 0.16 | ± | 0.20 | 0 | ± | 0 | 0.19 | ± | 0.11 | 0 | ± | 0 |
| *Lomentaria articulata* | 0 | ± | 0 | 0 | ± | 0 | 0 | ± | 0 | 0 | ± | 0 | 0 | ± | 0 | 0 | ± | 0 |
| *Lomentaria catenata* | 0 | ± | 0 | 0 | ± | 0 | 0 | ± | 0 | 0 | ± | 0 | 0 | ± | 0 | 0 | ± | 0 |
| *Lophosiphonia reptabunda* | 0 | ± | 0 | 0 | ± | 0 | 0 | ± | 0 | 0 | ± | 0 | 0 | ± | 0 | 0 | ± | 0 |
| *Neogoniolithon brassica-florida* | 0 | ± | 0 | 0 | ± | 0 | 0 | ± | 0 | 0 | ± | 0 | 0 | ± | 0 | 0 | ± | 0 |
| *Mesophyllum expansum* | 2.46 | ± | 4.70 | 0 | ± | 0 | 0 | ± | 0 | 0 | ± | 0 | 0 | ± | 0 | 0 | ± | 0 |
| *Mesophyllum lichenoides* | 0.59 | ± | 1.16 | 0 | ± | 0 | 0 | ± | 0 | 0 | ± | 0 | 0 | ± | 0 | 0 | ± | 0 |
| *Monosporus pedicellatus* | 0 | ± | 0 | 0 | ± | 0 | 0 | ± | 0 | 0 | ± | 0 | 0.04 | ± | 0.07 | 0 | ± | 0 |
| *Ophiocladus simplicimus* | 0 | ± | 0 | 0 | ± | 0 | 0 | ± | 0 | 0 | ± | 0 | 0 | ± | 0 | 0 | ± | 0 |
| *Osmundea hybrida* | 0.18 | ± | 0.35 | 0.01 | ± | 0.01 | 0 | ± | 0 | 0 | ± | 0 | 0.29 | ± | 0.50 | 0 | ± | 0 |
| *Osmundea pinnatifida* | 0 | ± | 0 | 0.01 | ± | 0.02 | 0.18 | ± | 0.30 | 0 | ± | 0 | 0.15 | ± | 0.25 | 0 | ± | 0 |
| *Peyssonelia coriacea* | 0 | ± | 0 | 0 | ± | 0 | 0 | ± | 0 | 0 | ± | 0 | 0 | ± | 0 | 0 | ± | 0 |
| *Peyssonnelia dubyi* | 0 | ± | 0 | 0 | ± | 0 | 0 | ± | 0 | 0 | ± | 0 | 0 | ± | 0 | 0 | ± | 0 |
| *Pleonosporium borreri* | 0 | ± | 0 | 0 | ± | 0 | 0 | ± | 0 | 0 | ± | 0 | 0 | ± | 0 | 0 | ± | 0 |
| *Plocamium cartilagineum* | 0 | ± | 0 | 0 | ± | 0.01 | 0 | ± | 0 | 0 | ± | 0 | 0 | ± | 0 | 0 | ± | 0 |
| *Polysiphonia* cf *nigra* | 0 | ± | 0 | 0 | ± | 0 | 0.04 | ± | 0.07 | 0 | ± | 0 | 0 | ± | 0 | 0 | ± | 0 |
| *Polysiphonia* spp. | 0 | ± | 0 | 0 | ± | 0 | 0.04 | ± | 0.06 | 0 | ± | 0 | 0 | ± | 0 | 0 | ± | 0 |
| *Porphyra* cf *leucosticta* | 0 | ± | 0 | 0 | ± | 0 | 0 | ± | 0 | 0 | ± | 0 | 0 | ± | 0 | 0 | ± | 0 |
| *Pterocladiella capillacea* | 5.39 | ± | 5.84 | 0.66 | ± | 1.32 | 0 | ± | 0 | 0 | ± | 0 | 0 | ± | 0 | 0 | ± | 0 |
| *Pterosiphonia ardreana* | 0 | ± | 0 | 0 | ± | 0 | 0 | ± | 0 | 0 | ± | 0 | 0 | ± | 0 | 0 | ± | 0 |
| *Pterosiphonia complanata* | 1.68 | ± | 1.09 | 0 | ± | 0 | 0.25 | ± | 0.44 | 0 | ± | 0 | 0 | ± | 0 | 0 | ± | 0 |
| *Pterosiphonia parasitica* | 0 | ± | 0 | 0 | ± | 0 | 0 | ± | 0 | 0 | ± | 0 | 0 | ± | 0 | 0 | ± | 0 |
| *Pterosiphonia pennata* | 0 | ± | 0 | 0 | ± | 0 | 0 | ± | 0 | 0 | ± | 0 | 0.38 | ± | 0.48 | 0 | ± | 0 |
| *Rhodophyllis divaricata* | 0.11 | ± | 0.20 | 0 | ± | 0 | 0 | ± | 0 | 0 | ± | 0.01 | 0.25 | ± | 0.44 | 0 | ± | 0 |
| *Rhodymenia ardissonei* | 0 | ± | 0 | 0 | ± | 0 | 0 | ± | 0 | 0 | ± | 0 | 0 | ± | 0 | 0 | ± | 0 |
| *Rythyplaea tinctoria* | 0 | ± | 0 | 0 | ± | 0 | 0 | ± | 0 | 0 | ± | 0 | 0 | ± | 0 | 0 | ± | 0 |
| *Solieria chordalis* | 0 | ± | 0 | 0 | ± | 0 | 0 | ± | 0 | 0 | ± | 0 | 0 | ± | 0 | 0 | ± | 0 |
| *Spermothamnion repens* | 0 | ± | 0 | 0 | ± | 0 | 0 | ± | 0 | 0 | ± | 0 | 0.03 | ± | 0.05 | 0 | ± | 0 |
| *Sphaerococcus coronopifolius* | 0 | ± | 0 | 0 | ± | 0 | 0 | ± | 0 | 0 | ± | 0 | 0 | ± | 0 | 0 | ± | 0 |
| *Spyridia filamentosa* | 0 | ± | 0 | 0 | ± | 0 | 0 | ± | 0 | 0 | ± | 0 | 0 | ± | 0 | 0 | ± | 0 |
| *Taenioma nanum* | 0 | ± | 0 | 0 | ± | 0 | 0 | ± | 0 | 0 | ± | 0 | 0 | ± | 0 | 0 | ± | 0 |
| *Trailliella intricata* | 0 | ± | 0 | 0 | ± | 0 | 0 | ± | 0 | 0 | ± | 0 | 0 | ± | 0 | 0 | ± | 0 |
| *Acetabularia acetabulum* | 0 | ± | 0 | 0 | ± | 0 | 0 | ± | 0 | 0 | ± | 0 | 0 | ± | 0 | 0 | ± | 0 |
| *Bryopsis cf cupressina* | 0 | ± | 0 | 0 | ± | 0 | 0 | ± | 0 | 0 | ± | 0 | 0 | ± | 0 | 0 | ± | 0 |
| *Bryopsis duplex* | 0.01 | ± | 0.02 | 0 | ± | 0 | 0 | ± | 0 | 0 | ± | 0 | 0 | ± | 0 | 0 | ± | 0 |
| *Bryopsis hypnoides* | 0 | ± | 0 | 0 | ± | 0 | 0 | ± | 0 | 0 | ± | 0 | 0 | ± | 0 | 0 | ± | 0 |
| *Chaetomorpha aerea* | 0 | ± | 0 | 0 | ± | 0 | 0.04 | ± | 0.07 | 0 | ± | 0 | 0 | ± | 0 | 0 | ± | 0 |
| *Chaetomorpha ligustica* | 0 | ± | 0 | 0 | ± | 0 | 0 | ± | 0 | 0 | ± | 0 | 0 | ± | 0 | 0 | ± | 0 |
| *Chaetomorpha mediterranea* | 0 | ± | 0 | 0 | ± | 0 | 0 | ± | 0 | 0 | ± | 0 | 0 | ± | 0 | 0 | ± | 0 |
| *Cladophora sericea* | 0 | ± | 0 | 0.08 | ± | 0.17 | 0 | ± | 0 | 0 | ± | 0 | 4.55 | ± | 4.02 | 0 | ± | 0 |
| *Cladophora hutchinsiae* | 0.24 | ± | 0.30 | 0.06 | ± | 0.12 | 0.18 | ± | 0.30 | 0 | ± | 0 | 0.36 | ± | 0.33 | 0 | ± | 0 |
| *Cladophora laetevirens* | 0.12 | ± | 0.22 | 0 | ± | 0 | 0.01 | ± | 0.01 | 0.09 | ± | 0.18 | 1.34 | ± | 2.34 | 0 | ± | 0 |
| *Cladophora prolifera* | 0 | ± | 0 | 1.51 | ± | 3.02 | 0 | ± | 0 | 0 | ± | 0.01 | 12.47 | ± | 17.01 | 0 | ± | 0 |
| *Codium adhaerens* | 0 | ± | 0 | 1.42 | ± | 2.84 | 0 | ± | 0 | 0 | ± | 0 | 0 | ± | 0 | 0 | ± | 0 |
| *Codium bursa* | 0 | ± | 0 | 0 | ± | 0 | 0 | ± | 0 | 0 | ± | 0 | 0 | ± | 0 | 0 | ± | 0 |
| *Codium fragile* | 0 | ± | 0 | 0 | ± | 0 | 0 | ± | 0 | 0 | ± | 0 | 0 | ± | 0 | 0 | ± | 0 |
| *Derbesia marina* | 0 | ± | 0 | 0 | ± | 0 | 0 | ± | 0 | 0 | ± | 0 | 0 | ± | 0 | 0 | ± | 0 |
| *Pedobepsia simplex* | 0 | ± | 0 | 0 | ± | 0 | 0 | ± | 0 | 0 | ± | 0 | 0 | ± | 0 | 0 | ± | 0 |
| *Ulva compressa* | 0.01 | ± | 0.02 | 0 | ± | 0 | 0.03 | ± | 0.04 | 0 | ± | 0 | 0 | ± | 0 | 0 | ± | 0 |

**Table S2 (cont.).-** Mean abundance (gr) at each sampling site. Mean ± Standard Deviation.

| **Taxa** | **SJ** | | | **Ne** | | | **Al** | | | **Mo** | | | **Pa** | | | **ST** | | |
| --- | --- | --- | --- | --- | --- | --- | --- | --- | --- | --- | --- | --- | --- | --- | --- | --- | --- | --- |
| *Gelidium pusillum* | 0 | ± | 0 | 0 | ± | 0 | 0 | ± | 0 | 0.06 | ± | 0.08 | 0.03 | ± | 0.04 | 0.01 | ± | 0.01 |
| *Gracilaria* cf *armata* | 0.17 | ± | 0.28 | 0 | ± | 0 | 0 | ± | 0 | 0 | ± | 0 | 0 | ± | 0 | 0 | ± | 0 |
| *Grateloupia subpectinata* | 0 | ± | 0 | 0 | ± | 0 | 0 | ± | 0 | 0 | ± | 0 | 0 | ± | 0 | 0 | ± | 0 |
| *Griffithsia* spp. | 0 | ± | 0 | 0 | ± | 0 | 0 | ± | 0 | 0.03 | ± | 0.06 | 0 | ± | 0 | 0 | ± | 0 |
| *Gymnogongrus crenulatus* | 0 | ± | 0 | 0 | ± | 0 | 0 | ± | 0 | 0 | ± | 0 | 0 | ± | 0 | 0 | ± | 0 |
| *Gymnogongrus griffithsiae* | 0 | ± | 0 | 0 | ± | 0 | 0.77 | ± | 1.32 | 0 | ± | 0 | 0 | ± | 0 | 0 | ± | 0 |
| *Haliptilon squamatum* | 0 | ± | 0 | 0 | ± | 0 | 0.02 | ± | 0.03 | 0 | ± | 0.02 | 0 | ± | 0 | 0 | ± | 0 |
| *Haliptilon virgatum* | 0.74 | ± | 1.19 | 11.94 | ± | 6.73 | 2.98 | ± | 2.37 | 9.27 | ± | 8.76 | 1.50 | ± | 2.59 | 0.70 | ± | 0.59 |
| *Halopithys incurva* | 0 | ± | 0 | 0 | ± | 0 | 0.01 | ± | 0.03 | 0 | ± | 0 | 0 | ± | 0 | 0 | ± | 0 |
| *Halurus flosculosus* | 0 | ± | 0 | 0 | ± | 0 | 0 | ± | 0 | 0 | ± | 0 | 0 | ± | 0 | 0 | ± | 0 |
| *Haraldia lenormandii* | 0 | ± | 0 | 0 | ± | 0 | 0 | ± | 0 | 0 | ± | 0 | 0 | ± | 0 | 0 | ± | 0 |
| *Haraldiophyllum bonnemaisonii* | 0 | ± | 0 | 0 | ± | 0 | 0 | ± | 0 | 0 | ± | 0 | 0 | ± | 0 | 0 | ± | 0 |
| *Hildenbrandia rubra* | 0 | ± | 0 | 0.12 | ± | 0.10 | 0 | ± | 0 | 0 | ± | 0 | 0.05 | ± | 0.05 | 0 | ± | 0 |
| *Herposiphonia secunda* | 0.02 | ± | 0.01 | 1.17 | ± | 1.08 | 0 | ± | 0 | 0.12 | ± | 0.22 | 0.25 | ± | 0.11 | 1.60 | ± | 2.48 |
| *Heterosiphonia crispella* | 0 | ± | 0 | 0.19 | ± | 0.24 | 0 | ± | 0 | 0 | ± | 0 | 0 | ± | 0 | 0 | ± | 0 |
| *Hypnea musciformis* | 0.71 | ± | 1.17 | 2.45 | ± | 2.33 | 0 | ± | 0 | 0.06 | ± | 0.14 | 2.68 | ± | 4.24 | 1.11 | ± | 0.88 |
| *Hypoglossum hypoglosoides* | 0 | ± | 0 | 0 | ± | 0 | 0 | ± | 0 | 0 | ± | 0 | 0 | ± | 0 | 0 | ± | 0.01 |
| *Jania longifurca* | 0 | ± | 0 | 0 | ± | 0 | 0 | ± | 0 | 0.02 | ± | 0.03 | 0 | ± | 0 | 0 | ± | 0 |
| *Jania rubens* | 2.33 | ± | 2.05 | 0.14 | ± | 0.23 | 1.24 | ± | 2.12 | 1.33 | ± | 1.98 | 1.89 | ± | 3.29 | 13.10 | ± | 16.57 |
| *Lejolisia* sp. | 0 | ± | 0 | 0 | ± | 0 | 0 | ± | 0 | 0 | ± | 0 | 0 | ± | 0 | 0 | ± | 0 |
| *Laurencia obtusa* | 0.03 | ± | 0.02 | 0 | ± | 0 | 0.58 | ± | 1.00 | 0 | ± | 0 | 0.08 | ± | 0.14 | 0.09 | ± | 0.14 |
| *Lithophyllum corallinae* | 0 | ± | 0 | 0 | ± | 0 | 0 | ± | 0 | 0 | ± | 0 | 0 | ± | 0 | 0 | ± | 0 |
| *Lithophyllum incrustans* | 0.45 | ± | 0.40 | 0.35 | ± | 0.13 | 0.43 | ± | 0.42 | 0.03 | ± | 0.03 | 0.13 | ± | 0.23 | 0.53 | ± | 0.47 |
| *Lithophyllum lichenoides* | 0 | ± | 0 | 0 | ± | 0 | 0 | ± | 0 | 0 | ± | 0 | 0 | ± | 0 | 0 | ± | 0 |
| *Lithophyllum pustulatum* | 0 | ± | 0 | 0.05 | ± | 0 | 0.05 | ± | 0.05 | 0.02 | ± | 0.03 | 0.02 | ± | 0.03 | 0.03 | ± | 0.03 |
| *Lomentaria articulata* | 0 | ± | 0 | 0 | ± | 0 | 0.01 | ± | 0.01 | 0 | ± | 0 | 0 | ± | 0 | 0 | ± | 0 |
| *Lomentaria catenata* | 0 | ± | 0 | 0 | ± | 0 | 0 | ± | 0 | 0 | ± | 0 | 0 | ± | 0 | 0 | ± | 0 |
| *Lophosiphonia reptabunda* | 0 | ± | 0 | 0 | ± | 0 | 0 | ± | 0 | 0 | ± | 0 | 0 | ± | 0 | 0 | ± | 0 |
| *Neogoniolithon brassica-florida* | 0 | ± | 0 | 0.03 | ± | 0.06 | 0 | ± | 0 | 0 | ± | 0 | 0.12 | ± | 0.13 | 0 | ± | 0 |
| *Mesophyllum expansum* | 0 | ± | 0 | 0 | ± | 0 | 0 | ± | 0 | 0 | ± | 0 | 0 | ± | 0 | 0 | ± | 0 |
| *Mesophyllum lichenoides* | 0 | ± | 0 | 0 | ± | 0 | 0 | ± | 0 | 0 | ± | 0 | 0 | ± | 0 | 0 | ± | 0 |
| *Monosporus pedicellatus* | 0 | ± | 0 | 0 | ± | 0 | 0 | ± | 0 | 0 | ± | 0 | 0 | ± | 0 | 0 | ± | 0 |
| *Ophiocladus simplicimus* | 0 | ± | 0 | 0 | ± | 0 | 0 | ± | 0 | 0 | ± | 0 | 0 | ± | 0 | 0 | ± | 0 |
| *Osmundea hybrida* | 0.12 | ± | 0.20 | 0 | ± | 0 | 0 | ± | 0 | 0.07 | ± | 0.11 | 0 | ± | 0 | 0 | ± | 0 |
| *Osmundea pinnatifida* | 0 | ± | 0 | 0 | ± | 0 | 0 | ± | 0 | 0 | ± | 0 | 0.02 | ± | 0.03 | 0 | ± | 0 |
| *Peyssonelia coriacea* | 0.03 | ± | 0.06 | 0 | ± | 0 | 0 | ± | 0 | 0 | ± | 0 | 0 | ± | 0 | 0 | ± | 0 |
| *Peyssonnelia dubyi* | 0 | ± | 0 | 0 | ± | 0 | 0 | ± | 0 | 0 | ± | 0 | 0 | ± | 0 | 0 | ± | 0.01 |
| *Pleonosporium borreri* | 0 | ± | 0 | 0 | ± | 0 | 0 | ± | 0 | 0 | ± | 0 | 0 | ± | 0 | 0 | ± | 0 |
| *Plocamium cartilagineum* | 0 | ± | 0 | 0 | ± | 0 | 0 | ± | 0 | 0 | ± | 0 | 0 | ± | 0 | 0 | ± | 0 |
| *Polysiphonia* cf *nigra* | 0 | ± | 0 | 0 | ± | 0 | 0 | ± | 0 | 0 | ± | 0 | 0 | ± | 0 | 0 | ± | 0 |
| *Polysiphonia* spp. | 0 | ± | 0 | 0 | ± | 0 | 0 | ± | 0 | 0.29 | ± | 0.40 | 0 | ± | 0 | 0 | ± | 0 |
| *Porphyra* cf *leucosticta* | 0 | ± | 0 | 0 | ± | 0 | 0 | ± | 0 | 0 | ± | 0 | 0 | ± | 0 | 0 | ± | 0 |
| *Pterocladiella capillacea* | 0 | ± | 0 | 0 | ± | 0 | 0 | ± | 0 | 0 | ± | 0 | 0 | ± | 0 | 0 | ± | 0 |
| *Pterosiphonia ardreana* | 0 | ± | 0 | 0 | ± | 0 | 0 | ± | 0 | 0 | ± | 0 | 0 | ± | 0 | 0 | ± | 0 |
| *Pterosiphonia complanata* | 0 | ± | 0 | 0 | ± | 0 | 0 | ± | 0 | 0 | ± | 0 | 0 | ± | 0 | 0 | ± | 0 |
| *Pterosiphonia parasitica* | 0 | ± | 0 | 0 | ± | 0 | 0 | ± | 0 | 0 | ± | 0 | 0 | ± | 0 | 0 | ± | 0 |
| *Pterosiphonia pennata* | 0 | ± | 0 | 0 | ± | 0 | 0.34 | ± | 0.59 | 0.05 | ± | 0.12 | 0 | ± | 0 | 0 | ± | 0 |
| *Rhodophyllis divaricata* | 0 | ± | 0 | 0 | ± | 0 | 0 | ± | 0 | 0 | ± | 0 | 0 | ± | 0 | 0 | ± | 0 |
| *Rhodymenia ardissonei* | 0 | ± | 0 | 0 | ± | 0 | 0 | ± | 0 | 0 | ± | 0 | 0 | ± | 0 | 0 | ± | 0 |
| *Rythyplaea tinctoria* | 0 | ± | 0 | 0 | ± | 0 | 0 | ± | 0 | 0 | ± | 0 | 0 | ± | 0.01 | 0 | ± | 0 |
| *Solieria chordalis* | 0 | ± | 0 | 0 | ± | 0 | 0 | ± | 0 | 0 | ± | 0 | 0 | ± | 0 | 0 | ± | 0 |
| *Spermothamnion repens* | 0 | ± | 0 | 0 | ± | 0 | 0 | ± | 0 | 0 | ± | 0 | 0 | ± | 0 | 0 | ± | 0 |
| *Sphaerococcus coronopifolius* | 0 | ± | 0 | 0 | ± | 0 | 0 | ± | 0 | 0 | ± | 0 | 0 | ± | 0 | 0 | ± | 0 |
| *Spyridia filamentosa* | 0 | ± | 0 | 0 | ± | 0 | 0 | ± | 0 | 0 | ± | 0 | 0.04 | ± | 0.07 | 0 | ± | 0 |
| *Taenioma nanum* | 0 | ± | 0 | 0 | ± | 0 | 0 | ± | 0 | 0 | ± | 0 | 0 | ± | 0 | 0.03 | ± | 0.04 |
| *Trailliella intricata* | 0 | ± | 0 | 0 | ± | 0 | 0 | ± | 0 | 0 | ± | 0 | 0 | ± | 0 | 0 | ± | 0 |
| *Acetabularia acetabulum* | 0.03 | ± | 0.06 | 0 | ± | 0 | 0 | ± | 0 | 0 | ± | 0 | 0 | ± | 0 | 0 | ± | 0 |
| *Bryopsis cf cupressina* | 0 | ± | 0 | 0 | ± | 0 | 0 | ± | 0 | 0 | ± | 0 | 0 | ± | 0 | 0 | ± | 0 |
| *Bryopsis duplex* | 0 | ± | 0 | 0 | ± | 0 | 0 | ± | 0 | 0 | ± | 0 | 0 | ± | 0 | 0 | ± | 0 |
| *Bryopsis hypnoides* | 0 | ± | 0 | 0 | ± | 0 | 0 | ± | 0 | 0 | ± | 0 | 0 | ± | 0 | 0 | ± | 0 |
| *Chaetomorpha aerea* | 0 | ± | 0 | 0 | ± | 0 | 0 | ± | 0 | 0 | ± | 0 | 0 | ± | 0 | 0 | ± | 0.01 |
| *Chaetomorpha ligustica* | 0 | ± | 0 | 0 | ± | 0 | 0 | ± | 0 | 0 | ± | 0 | 0 | ± | 0 | 0 | ± | 0 |
| *Chaetomorpha mediterranea* | 0 | ± | 0 | 0 | ± | 0 | 0 | ± | 0 | 0 | ± | 0 | 0 | ± | 0 | 0 | ± | 0 |
| *Cladophora sericea* | 0 | ± | 0 | 0.09 | ± | 0.16 | 0 | ± | 0 | 0.20 | ± | 0.24 | 0 | ± | 0 | 0 | ± | 0 |
| *Cladophora hutchinsiae* | 0 | ± | 0 | 0 | ± | 0 | 0 | ± | 0 | 0 | ± | 0 | 0.20 | ± | 0.35 | 0.18 | ± | 0.24 |
| *Cladophora laetevirens* | 0.07 | ± | 0.12 | 0.08 | ± | 0.13 | 0.20 | ± | 0.35 | 0 | ± | 0 | 0.59 | ± | 0.58 | 0.03 | ± | 0.05 |
| *Cladophora prolifera* | 0.27 | ± | 0.28 | 0 | ± | 0 | 0 | ± | 0 | 0 | ± | 0 | 0 | ± | 0 | 0.03 | ± | 0.04 |
| *Codium adhaerens* | 0 | ± | 0 | 0 | ± | 0 | 0 | ± | 0 | 0 | ± | 0 | 0 | ± | 0 | 0 | ± | 0 |
| *Codium bursa* | 0 | ± | 0 | 0 | ± | 0 | 0 | ± | 0 | 0 | ± | 0 | 0 | ± | 0 | 0 | ± | 0 |
| *Codium fragile* | 0 | ± | 0 | 0 | ± | 0 | 0 | ± | 0 | 0 | ± | 0 | 0 | ± | 0 | 0 | ± | 0 |
| *Derbesia marina* | 0 | ± | 0 | 0 | ± | 0 | 0 | ± | 0 | 0 | ± | 0 | 0 | ± | 0 | 0 | ± | 0 |
| *Pedobepsia simplex* | 0 | ± | 0 | 0 | ± | 0 | 0 | ± | 0 | 0 | ± | 0 | 0 | ± | 0 | 0 | ± | 0 |
| *Ulva compressa* | 0 | ± | 0.01 | 0 | ± | 0 | 0 | ± | 0 | 0 | ± | 0 | 0.01 | ± | 0.02 | 0 | ± | 0 |

**Table S2 (cont.).-** Mean abundance (gr) of taxa at each sampling site. Mean ± Standard Deviation.

| **Taxa** | **Mi** | | | **TG** | | | **CH** | | | **TQ** | | | **Ar** | | | **Ca** | | |
| --- | --- | --- | --- | --- | --- | --- | --- | --- | --- | --- | --- | --- | --- | --- | --- | --- | --- | --- |
| *Ulva clathrata* | 0.01 | ± | 0.03 | 0.04 | ± | 0.04 | 0 | ± | 0 | 0 | ± | 0 | 0 | ± | 0 | 0 | ± | 0 |
| *Ulva rigida* | 0 | ± | 0 | 0.22 | ± | 0.19 | 0.01 | ± | 0.02 | 0.24 | ± | 0.41 | 0.87 | ± | 1.26 | 0.19 | ± | 0.08 |
| *Valonia utricularis* | 0 | ± | 0 | 0 | ± | 0 | 0 | ± | 0 | 0 | ± | 0 | 0 | ± | 0 | 0 | ± | 0 |
| *Vaucheria* spp. | 0 | ± | 0 | 0 | ± | 0 | 0 | ± | 0 | 0 | ± | 0 | 0 | ± | 0 | 0 | ± | 0 |
| *Mytilidae* | 0.01 | ± | 0.03 | 0 | ± | 0 | 0.24 | ± | 0.24 | 0.40 | ± | 0.40 | 206.34 | ± | 112.85 | 215.74 | ± | 73.43 |
| *Ostreidae* | 0 | ± | 0 | 0 | ± | 0 | 0 | ± | 0 | 0 | ± | 0 | 0 | ± | 0 | 0 | ± | 0 |
| *Balanus* spp. | 0.05 | ± | 0.11 | 0 | ± | 0 | 2.36 | ± | 3.86 | 3.18 | ± | 5.50 | 2.48 | ± | 4.29 | 4.53 | ± | 4.63 |
| *Cheilostomatida* | 0.95 | ± | 1.89 | 0 | ± | 0 | 0 | ± | 0 | 0 | ± | 0 | 0 | ± | 0 | 0.37 | ± | 0.65 |
| *Didemnidae* | 0 | ± | 0 | 1.77 | ± | 0.98 | 0 | ± | 0 | 0 | ± | 0 | 0 | ± | 0 | 0 | ± | 0 |
| *Actinia equina* | 0 | ± | 0 | 0 | ± | 0 | 0 | ± | 0 | 0 | ± | 0 | 0 | ± | 0 | 0.29 | ± | 0.50 |
| *Lithophaga* spp. | 0 | ± | 0 | 0 | ± | 0 | 0 | ± | 0 | 0 | ± | 0 | 0 | ± | 0 | 0.30 | ± | 0.52 |
| *Briozoo* | 0 | ± | 0 | 0 | ± | 0 | 0 | ± | 0 | 0 | ± | 0 | 0 | ± | 0 | 0.08 | ± | 0.16 |
| *Aglaophenia* spp. | 0 | ± | 0 | 0 | ± | 0 | 0 | ± | 0 | 0 | ± | 0 | 0 | ± | 0 | 0 | ± | 0 |
| **Taxa** | **He** | | | **Ri** | | | **CR** | | | **GV** | | | **Rq** | | | **Co** | | |
| *Ulva clathrata* | 0 | ± | 0 | 0 | ± | 0 | 0 | ± | 0 | 0 | ± | 0 | 0 | ± | 0 | 0 | ± | 0 |
| *Ulva rigida* | 0.17 | ± | 0.20 | 0.21 | ± | 0.29 | 0.07 | ± | 0.12 | 0.14 | ± | 0.26 | 0.09 | ± | 0.08 | 0 | ± | 0 |
| *Valonia utricularis* | 0 | ± | 0 | 0 | ± | 0 | 0 | ± | 0 | 0 | ± | 0 | 0 | ± | 0 | 0 | ± | 0 |
| *Vaucheria* spp. | 0 | ± | 0 | 0 | ± | 0 | 0 | ± | 0 | 0 | ± | 0 | 0 | ± | 0 | 0 | ± | 0 |
| *Mytilidae* | 0.56 | ± | 0.43 | 1.01 | ± | 1.19 | 0.70 | ± | 0.59 | 0.62 | ± | 1.19 | 2.71 | ± | 4.51 | 0 | ± | 0 |
| *Ostreidae* | 2.67 | ± | 5.33 | 0 | ± | 0 | 0 | ± | 0 | 0.56 | ± | 1.13 | 0 | ± | 0 | 0 | ± | 0 |
| *Balanus* spp. | 20.38 | ± | 7.80 | 1.91 | ± | 2.31 | 0 | ± | 0 | 0 | ± | 0 | 0 | ± | 0 | 0 | ± | 0 |
| *Cheilostomatida* | 5.05 | ± | 10.08 | 0 | ± | 0 | 0 | ± | 0 | 0 | ± | 0 | 0 | ± | 0 | 0 | ± | 0 |
| *Didemnidae* | 0 | ± | 0 | 0 | ± | 0 | 0 | ± | 0 | 0 | ± | 0 | 0.55 | ± | 0.95 | 0 | ± | 0 |
| *Actinia equina* | 0.22 | ± | 0.40 | 0 | ± | 0 | 0 | ± | 0 | 0 | ± | 0 | 0 | ± | 0 | 0 | ± | 0 |
| *Lithophaga* spp. | 0 | ± | 0 | 0 | ± | 0 | 0 | ± | 0 | 0 | ± | 0 | 0 | ± | 0 | 0 | ± | 0 |
| *Briozoo* | 0.42 | ± | 0.37 | 0.01 | ± | 0.02 | 0.03 | ± | 0.02 | 0 | ± | 0 | 0 | ± | 0 | 0 | ± | 0 |
| *Aglaophenia* spp. | 0.04 | ± | 0.09 | 0.32 | ± | 0.64 | 0 | ± | 0 | 0 | ± | 0 | 0 | ± | 0 | 0 | ± | 0 |
| **Taxa** | **SJ** | | | **Ne** | | | **Al** | | | **Mo** | | | **Pa** | | | **ST** | | |
| *Ulva clathrata* | 0 | ± | 0 | 0 | ± | 0 | 0 | ± | 0 | 0 | ± | 0 | 0 | ± | 0 | 0 | ± | 0 |
| *Ulva rigida* | 0.24 | ± | 0.32 | 0 | ± | 0 | 0 | ± | 0 | 0 | ± | 0 | 0 | ± | 0 | 0 | ± | 0 |
| *Valonia utricularis* | 0 | ± | 0 | 0 | ± | 0 | 0.24 | ± | 0.41 | 0 | ± | 0 | 0 | ± | 0 | 0 | ± | 0 |
| *Vaucheria* spp. | 0 | ± | 0 | 0 | ± | 0 | 0 | ± | 0 | 0 | ± | 0 | 0 | ± | 0 | 0 | ± | 0 |
| *Mytilidae* | 0.13 | ± | 0.23 | 0.11 | ± | 0.11 | 0.45 | ± | 0.46 | 0.14 | ± | 0.14 | 0 | ± | 0 | 0 | ± | 0 |
| *Ostreidae* | 0 | ± | 0 | 0 | ± | 0 | 0 | ± | 0 | 0 | ± | 0 | 0 | ± | 0 | 0 | ± | 0 |
| *Balanus* spp. | 0 | ± | 0 | 0 | ± | 0 | 0.09 | ± | 0.09 | 0 | ± | 0 | 0 | ± | 0 | 0 | ± | 0 |
| *Cheilostomatida* | 2.64 | ± | 2.62 | 8.04 | ± | 3.41 | 2.82 | ± | 4.88 | 5.21 | ± | 3.61 | 0 | ± | 0 | 5.53 | ± | 9.58 |
| *Didemnidae* | 0.57 | ± | 1.00 | 1.98 | ± | 1.77 | 0 | ± | 0 | 0 | ± | 0 | 0 | ± | 0 | 0.45 | ± | 0.40 |
| *Actinia equina* | 0 | ± | 0 | 0.01 | ± | 0.03 | 0 | ± | 0 | 0 | ± | 0 | 0 | ± | 0 | 0 | ± | 0 |
| *Lithophaga* spp. | 0 | ± | 0 | 0 | ± | 0 | 0 | ± | 0 | 0.24 | ± | 0.29 | 0 | ± | 0 | 0 | ± | 0 |
| *Briozoo* | 0 | ± | 0 | 0.26 | ± | 0.30 | 0 | ± | 0 | 0 | ± | 0 | 0 | ± | 0 | 0 | ± | 0 |
| *Aglaophenia* spp. | 0 | ± | 0 | 0 | ± | 0 | 0 | ± | 0 | 0 | ± | 0 | 0 | ± | 0 | 0 | ± | 0 |
